1 **Title: SiCTeC: an inexpensive, easily assembled Peltier device for rapid temperature**  
2 **shifting during single-cell imaging**

3

4 **Short title: SiCTeC enables rapid temperature modulation during single-cell imaging**

5

6 **Authors:** Benjamin D. Knapp<sup>1,\*</sup>, Lillian Zhu<sup>2,\*</sup>, Kerwyn Casey Huang<sup>1,2,3,4,†</sup>

7

8 **Affiliations:**

9 <sup>1</sup>Biophysics Program, Stanford University, Stanford, CA 94305

10 <sup>2</sup>Department of Bioengineering, Stanford University, Stanford, CA 94305

11 <sup>3</sup>Department of Microbiology and Immunology, Stanford University School of  
12 Medicine, Stanford, CA 94305

13 <sup>4</sup>Chan Zuckerberg Biohub, San Francisco, CA 94158

14

15 \*: equal contributions.

16 †Correspondence: [kchuang@stanford.edu](mailto:kchuang@stanford.edu)

17

18 *Keywords:* open-source experimentation, Arduino, PBP2, PBP3, temperature-sensitive  
19 mutants

## 20 **Abstract**

21 Single-cell imaging, combined with recent advances in image analysis and microfluidic  
22 technologies, have enabled fundamental discoveries of cellular responses to chemical  
23 perturbations that are often obscured by traditional liquid-culture experiments.

24 Temperature is an environmental variable well known to impact growth and to elicit  
25 specific stress responses at extreme values; it is often used as a genetic tool to

26 interrogate essential genes. However, the dynamic effects of temperature shifts have  
27 remained mostly unstudied at the single-cell level, due largely to engineering

28 challenges related to sample stability, heatsink considerations, and temperature

29 measurement and feedback. Additionally, the few commercially available temperature-  
30 control platforms are costly. Here, we report an inexpensive (<\$110) and modular

31 **Single-Cell Temperature Controller (SiCTeC)** device for microbial imaging, based on  
32 straightforward modifications of the typical slide-sample-coverslip approach to

33 microbial imaging, that controls temperature using a ring-shaped Peltier module and

34 microcontroller feedback. Through stable and precise ( $\pm 0.15$  °C) temperature control,

35 SiCTeC achieves reproducible and fast (1-2 min) temperature transitions with

36 programmable waveforms between room temperature and 45 °C with an air objective.

37 At the device's maximum temperature of 89 °C, SiCTeC revealed that *Escherichia coli*

38 cells progressively shrink and lose cellular contents. During oscillations between 30 °C

39 and 37 °C, cells rapidly adapted their response to temperature upshifts. Furthermore,

40 SiCTeC enabled the discovery of rapid morphological changes and enhanced sensitivity  
41 to substrate stiffness during upshifts to nonpermissive temperatures in temperature-  
42 sensitive mutants of cell-wall synthesis enzymes. Overall, the simplicity and  
43 affordability of SiCTeC empowers future studies of the temperature dependence of  
44 single-cell physiology.

## 45 **Introduction**

46

47 While chemical perturbations during single-cell imaging experiments have been made  
48 possible by microfluidic technologies [1, 2], other environmental variables such as  
49 temperature have been more difficult to precisely and rapidly manipulate during an  
50 experiment. Temperature has dramatic effects on virtually all cellular processes,  
51 including polymer behavior [3, 4], RNA and DNA polymerases [5, 6], ribosomal  
52 elongation [7], and overall enzyme kinetics and function [8]. These diverse,  
53 temperature-dependent processes have global impacts on cell growth, which cells must  
54 integrate and collectively optimize at each temperature [9].

55

56 Two predominant elements of experimental design limit our understanding of how  
57 cells respond to changes in temperature. First, bulk experiments are the standard for  
58 investigating the effects of temperature on steady-state cellular growth [10, 11]. By  
59 contrast, single-cell investigations reveal insights into morphological dynamics and  
60 population heterogeneity that cannot be achieved through bulk experimentation.  
61 Second, experimental designs tend to employ a single experimental temperature that  
62 maximizes growth rate (e.g. 37 °C for the enteric bacterium *Escherichia coli*). As a result,  
63 how cells respond to temperature fluctuations, such as during transitions into and out  
64 of a host, remains understudied; in *E. coli*, the few studies of temperature shifts have

65 shown long time scales for growth-rate equilibration [12] and transient changes to the  
66 synthesis rate of tRNA synthetases [13]. While intriguing, these limited results highlight  
67 the need for a device that enables single-cell imaging to investigate how individual cells  
68 respond to temperature fluctuations at high spatiotemporal resolution.

69  
70 Current microscope incubators are useful for maintaining temperature during time-  
71 lapse imaging, but are unable to precisely control the temperature of samples at short  
72 timescales. Consequently, a stage-top temperature controller for single-cell imaging is  
73 ideal for studying how cells transition between temperatures at high temporal  
74 resolution. Engineering such a device has remained challenging, as modifying  
75 temperature in real time requires sample stability, careful temperature measurement,  
76 and control feedback. Most commercial devices lack the capacity to program arbitrary  
77 temperature shift profiles and often can only heat samples to temperatures slightly  
78 higher than 37 °C. Further, the high cost of these devices (>\$10,000) prohibits broad  
79 accessibility.

80  
81 Recent low-cost alternatives to expensive laboratory techniques include electroporation  
82 [14], fluorescence microscopy and optogenetics [15], and nucleic acid extraction [16]. In  
83 addition to making science more open and accessible, particularly in resource-  
84 challenged institutions and countries [17], open-source experimentation can drive new

85 applications that are not currently achievable with commercial equipment, akin to the  
86 impact of the development of the open-source Linux kernel on computing [18]. Inspired  
87 by these successes, here we built an affordable and flexible temperature controller for  
88 single-cell imaging that meets several crucial design objectives: (1) inexpensive and  
89 accessible components, (2) easy to assemble and compatible with traditional slide-  
90 mount techniques, (3) temperature-stable, (4) reusable, (5) capable of rapid temperature  
91 switching, (6) programmable complex temperature routines, and (7) digital temperature  
92 readout in real time. We provide instruction to construct this device in just a few hours  
93 using a ring-shaped Peltier module heater and open-source temperature control  
94 software for <\$110. We used this device, the **Single-Cell Temperature Controller**  
95 (SiCTeC), to discover that wild-type *E. coli* cells rapidly adapt to temperature  
96 oscillations and lose cellular material at extreme temperatures, and that the phenotypes  
97 of temperature-sensitive *E. coli* cell-wall mutants quickly manifest but depend on the  
98 stiffness of the substrate on which they are grown. We anticipate that SiCTeC will drive  
99 fundamental research into the temperature dependence of cellular physiology and serve  
100 as a highly accessible device for precisely controlling environmental temperature.

## 101 **Results**

102

### 103 **Design of the temperature-control device**

104 To increase the utility of an inexpensive microscope stage-top temperature-control  
105 device, we based our development on existing imaging and sample preparation  
106 approaches. Our design modifies the traditional use of agarose hydrogel pads on glass  
107 slides as sample mounts [19] by adding a simple heating component and a temperature  
108 sensor (Fig. 1). To enable rapid and precise temperature changes, we implemented a  
109 Peltier-module design. Peltier modules are inexpensive semiconductor devices that  
110 drive large temperature gradients through the thermoelectric effect [20]. Although  
111 Peltier modules usually require large heatsinks to dissipate excess heat during cooling,  
112 we allowed the SiCTeC to self-heat (without a heatsink) to increase speed and  
113 performance, owing to its small size. SiCTeC consists of a ring-shaped Peltier module  
114 that permits illumination of samples during microscopy, which is crucial for single-cell  
115 investigations (Fig. 1A,B), and also ensures that heating is uniform across the sample.  
116

117 We monitor temperature using a thermistor, a device for which  $\log(\text{resistance})$  depends  
118 approximately linearly on the inverse of temperature, which we calibrated using a  
119 commercial thermocouple device (Methods). We sealed the thermistor to the coverslip  
120 by wrapping thermal tape around the slide and coverslip (Fig. 1C).

121

122 To actively control the temperature, we use the open-source Arduino platform to  
123 implement a proportional-integral-derivative (PID) algorithm, which is commonplace  
124 in systems design control [21] (Fig. 2A). Two separate methods control the temperature  
125 setpoint: (1) manual control, using a potentiometer with a set range of temperature  
126 values (Fig. 2B, S1A), or (2) programmed control with an executable function using the  
127 Arduino software. Having two options allows the user to either set target temperatures  
128 dynamically or to execute more complex temperature programs. The open-source  
129 software Processing [22] displays the temperature readout from the Arduino in real  
130 time and writes power and temperature data to a table (Fig. S1B). The temperature is  
131 read every 500 ms, and the error, defined as the difference between the current and  
132 target temperatures, is used as input for the PID algorithm (Fig. 2A). Starting from a 12  
133 V power supply, we use a buck converter to step down the power input, given the 5 V  
134 limit on the Peltier module (Fig. 2B, S1A). To modulate the power, we use a motor  
135 driver, which receives a pulse-width-modulation (PWM) signal from the Arduino's PID  
136 output (Fig. 2B, S1A). Together, these components are soldered onto a breadboard and  
137 placed into a plastic enclosure (Fig. S1A).

138

139 Due to their small size, imaging bacteria is conventionally performed with high-  
140 magnification oil-immersion objectives, which act as heatsinks when in contact with



141 samples. This issue can lead to incorrect temperature measurements and/or lack of  
142 temperature control at the sample plane due to heat dissipation, and also dramatically  
143 limits the speed of temperature shifts. Further, the physical constraints of keeping the  
144 thermistor in contact with the coverslip near the sample could obstruct imaging. To  
145 circumvent these issues, SiCTeC uses a 40X air objective with a relatively high  
146 numerical aperture (NA: 0.95) and a 1.5X tube lens to achieve an effective magnification  
147 of 60X. We found that this setup produces measurements of cellular dimensions with  
148 similar precision and accuracy to a 100X oil-immersion objective (NA: 1.45) (Fig. S2).  
149

150 The largest design challenge was to achieve imaging stability at high temperatures;  
151 hydrogel melting and subsequent focus and sample drifting rendered this goal  
152 problematic. To address these issues, we used a silicone gasket to secure hydrogels of at  
153 least 3% agarose (w/v), which have higher melting point and stiffness than lower  
154 agarose concentrations [23] (Fig. 1B,C). We also limited the maximum power delivered  
155 to the device at PWM = 50, out of a possible PWM = 255. In addition, we found that  
156 slower PID parameters allowed the hydrogel to equilibrate gradually, while still  
157 reaching the target temperature over a time period much shorter (1-2 min) than the  
158 doubling time of a fast-growing species such as *E. coli* (20-60 min) (Table S2).  
159

160 **SiCTeC maintains and increases temperature quickly across a wide range of**  
161 **temperatures**

162 To determine whether SiCTeC could maintain temperature for long periods of time, we  
163 set up an agarose pad with exponentially growing wild-type *E. coli* MG1655 cells from a  
164 37 °C liquid culture to mimic a typical time-lapse imaging experiment and attempted to  
165 maintain the temperature of the pad at 37 °C using our device. Monitoring the  
166 temperature at the coverslip using a thermistor for 24 h revealed that the temperature  
167 was highly stable, with a mean of 37.0±0.15 °C and a maximum deviation of 0.6 °C (Fig.  
168 3A, S3A). To validate that the temperature of the cells was essentially constant, we  
169 monitored cell growth for the first 70 min before the population became crowded,  
170 resulting in growth inhibition by surrounding cells (Fig. 3B,C). Cell morphology was  
171 maintained throughout the 70 min (Fig. 3B) and was consistent with previous studies  
172 performed at steady state [24]. Growth rate was maintained with an average of 1.98 h<sup>-1</sup>  
173 (Fig. 3C), similar to previous steady-state measurements of growth at 37 °C [25],  
174 indicating that the cells experienced a constant temperature environment.

175  
176 To measure the capacity of our device to maintain temperature across a range of  
177 temperatures, we heated an agarose pad from room temperature to temperatures  
178 ranging from 25 °C to 45 °C (Fig. 3D). In each case, the temperature equilibrated at the  
179 desired value within 2 min, and was maintained thereafter with a standard deviation

180 <0.2 °C (Fig. 3D,E). Up to 40 °C, the temperature control error did not depend on the  
181 target temperature (Fig. 3E); at higher temperatures the standard deviation remained  
182 low (<0.3 °C; Fig. 3E), although the slower PID parameters produced small oscillations  
183 around the target temperature (Fig. 3D), likely due to rapid cooling of the device at  
184 higher temperatures.

185  
186 To further interrogate the speed and flexibility of SiCTeC, we increased the temperature  
187 from 25 °C to 46 °C in a stepwise manner (Fig. 3F). The setpoint was first increased to 28  
188 °C and then increased by 2 °C every 5 min. In each case, the target temperature was  
189 reached within 2 min and remained stable thereafter (Fig. 3F). Higher temperatures  
190 underwent small oscillations (Fig. 3D), consistent with the single shift from room  
191 temperature to 45 °C (Fig. 3D).

192  
193 SiCTeC can also achieve much higher temperatures than have been previously been  
194 considered accessible for single-cell time-lapse imaging. At ~1/5 the maximum power of  
195 the Peltier module, the device stably reached 89 °C (Fig. 4A). Shifting the temperature  
196 from 37 °C to 89 °C melted the agarose hydrogel, but the silicone gasket provided a  
197 reservoir for the liquid to be retained during imaging (Fig. 4A,B). Some of the cells  
198 remained adhered to the coverslip at high temperatures, allowing single-cell tracking  
199 throughout the 30 min at 89 °C and subsequent cooling (Fig. 4B). At 89 °C, cells

200 maintained their shape but decreased in size, coincident with blebbing (Fig. 4B,C).  
201 Similar blebbing has been observed at very high temperatures using electron  
202 microscopy, and has been attributed to loss of outer-membrane material through  
203 vesiculation [26]. After cooling to room temperature, cells eventually became phase-  
204 bright, indicative of extreme protein stress (Fig. 4D) [27].

205  
206 Taken together, these data indicate that SiCTeC can impose temperature increases with  
207 almost arbitrary waveforms over an extremely wide range of temperatures.

208  
209 **SiCTeC enables temperature oscillations via passive cooling for rapid temperature**  
210 **downshifts**

211 Complex temperature dynamics can also involve temperature downshifts. To determine  
212 the speed at which the temperature drops back to ambient levels after the device was  
213 turned off, we grew *E. coli* cells to steady state at 30 °C and then placed them on an  
214 agarose pad subjected to oscillatory cycles of upshifts to 37 °C for 10 min followed by  
215 passive cooling (PWM=0, Fig. S3B) for 10 min (Fig. 5A). Active heating to 37 °C was  
216 achieved with a time constant of ~0.6 min, similar to our previous measurements (Fig.  
217 3D). Cooling exhibited a time constant of ~1.9 min (Fig. 5B), which is slower than the  
218 heating time constant but much faster than the doubling time of *E. coli* (~20 min at 37

219 °C). Thus, temperature changes in both directions can be achieved sufficiently quickly  
220 to program repeatable, precise, and nearly arbitrary temperature dynamics.

221  
222 To determine how *E. coli* cells respond to temperature oscillations, we quantified the  
223 growth rate of hundreds of cells throughout the first 60 min of the experiment (until the  
224 pad became crowded and growth slowed). Growth rate responded slowly to the initial  
225 temperature upshift, increasing by only ~14% after 10 min (Fig. 5C). However, growth  
226 rate responded much more quickly to the subsequent upshift (Fig. 5C), reaching the  
227 steady-state value of  $\sim 2 \text{ h}^{-1}$  within 7-8 min after the temperature increase was initiated.  
228 Downshift responses followed a similar trend: the decay of the growth rate was faster  
229 during the second downshift than during the first (Fig. 5C). These data reveal that cells  
230 adapt their response to temperature oscillations within a single oscillatory period (20  
231 min), which is shorter than a single doubling time for *E. coli*.

232  
233 **SiCTeC enables discovery of phenotypes associated with temperature-sensitive**  
234 **mutations**

235 A common strategy for studying loss-of-function mutations in essential genes has been  
236 to isolate temperature-sensitive (ts) mutants that only grow at the permissive  
237 temperature [28]. In many cases, it is thought that the switch to the non-permissive  
238 temperature destabilizes the protein of interest, making it non-functional, and

239 eventually results in growth inhibition. SiCTeC is ideal for examining how quickly  
240 growth inhibition emerges upon the temperature transition, as well as the phenotypic  
241 consequences of the switch. We focused on temperature-sensitive mutants of two  
242 penicillin-binding proteins (PBP) in *E. coli*. PBP2 is an essential enzyme responsible for  
243 cell wall cross-linking during elongation [29]. When PBP2 is fully inhibited by the  
244 antibiotic mecillinam, cells are unable to properly maintain their rod-like shape and  
245 become round [30]. PBP3 carries out cell wall cross-linking during cell division [31], and  
246 its inhibition by the antibiotic cephalexin inhibits division and causes filamentation [32].  
247 For both proteins, temperature-sensitive mutants have been isolated in which the  
248 proteins become functionally compromised and cells ultimately cannot grow at high  
249 temperatures (42 °C) [30, 32]. SiCTeC allowed us to shift these mutants from the lower,  
250 permissive temperature (30 °C) up to the non-permissive temperature (42 °C) and to  
251 track the entire trajectory of morphological changes in individual cells; such single-cell  
252 investigations have been inaccessible using traditional techniques.

253  
254 To verify single-cell phenotypes at non-permissive temperatures, we grew PBP2ts  
255 (SP4500, Methods) and PBP3ts (JE7611) cells in LB at 30 °C in liquid culture into log  
256 phase and then back-diluted the cultures and grew them at 42 °C in LB for 2 h before  
257 imaging them on agarose pads. PBP2ts cells were football-shaped (Fig. 6A, left), and  
258 PBP3ts cells were filamentous (Fig. 6A, right), as expected.

259

260 To monitor single-cell morphology during the upshift, we grew the PBPts mutants into  
261 steady state (Methods) in liquid LB at 30 °C, placed them on a 3% agarose pad, and  
262 shifted the temperature to 42 °C using SiCTeC (Fig. 6B). In PBP3ts cells, division halted  
263 almost immediately but cells continued to elongate (Fig. 6C,D). Within 75 min after  
264 shifting to 42 °C, mean cell length increased nearly 4-fold (Fig. 6E), while the growth  
265 rate was maintained (Fig. S4B). Thus, the temperature shift inactivates PBP3 almost  
266 immediately without causing any obvious side effects at the cellular level.

267

268 On 3% agarose pads, PBP2ts cells remained approximately rod-shaped 40 min after the  
269 shift to 42 °C (Fig. 6F, top). By 40 min, some cells had started to lyse (Fig. 6F, top); lysis  
270 continued at 100 min, at which point cells were either small spheres or short rods (Fig.  
271 S4A). These data suggested that growth on the 3% agarose pad unexpectedly altered the  
272 morphological trajectory and compromised the mechanical integrity of the cell wall. To  
273 test this hypothesis, we performed a similar experiment on 1.5% agarose pads, which  
274 have substantially lower mechanical stiffness [23]. In this case, we observed swelling of  
275 PBP2ts cells within 15 min after shifting to 42 °C, and the football-shaped phenotype  
276 was reached within 45 min without any signs of lysis (Fig. 6F, bottom).

277

278 These results demonstrate that SiCTeC enables novel biological discoveries by  
279 providing information about single-cell dynamics that is inaccessible in bulk liquid-  
280 culture experiments.



## 281 DISCUSSION

282 Here, we have demonstrated that a stage-top temperature controller for single-cell  
283 imaging at above-ambient temperatures can be assembled using low-cost and accessible  
284 components (Table S1). SiCTeC can achieve relatively fast temperature increases (1-2  
285 min; Fig. 3D), and passive cooling is sufficiently fast for single-cell studies (4-5 min; Fig.  
286 5A,B). While the SiCTeC can in principle achieve much faster heating using more  
287 aggressive PID parameters, we found that melting of the pad and subsequent image  
288 plane and cell drifting made such conditions incompatible with traditional agarose pad-  
289 based single-cell imaging. To achieve faster cooling, the device would need to draw  
290 heat to maintain a temperature gradient (heatsink) and include a method for quick heat  
291 dissipation (such as a fan). While we were able to incorporate both features in prototype  
292 devices, our studies indicate that the simpler and less complex device we have  
293 presented here is sufficient for studies of cell growth. A large heatsink with fan-assisted  
294 heat dissipation would potentially allow for stable below-ambient temperatures in  
295 future iterations of the device.

296  
297 Some commercial devices are capable of very short heating and cooling times (~10 s)  
298 using a fluidic approach [33]. These devices are limited in agarose pad sample sizes,  
299 making long-term experiments difficult. Using large agarose pads, we can image for  
300 many hours on our device without drying or starvation. Further, fluidic designs have a

301 maximum temperature of 45 °C [33], whereas SiCTeC can maintain extreme  
302 temperatures of nearly 90 °C (Fig. 4). The flexibility of our device in terms of  
303 programming near-arbitrary temperature dynamics is also unmatched. While other  
304 modified devices have recently been constructed to allow for imaging at extreme  
305 temperatures [34, 35], these instruments are more expensive than SiCTeC, highly  
306 customized, and limited to fluorescence imaging. Our device is entirely compatible with  
307 both brightfield and fluorescence imaging, which can be utilized to study protein  
308 localization and expression changes during temperature shifts as long as the  
309 temperature dependence of fluorescence is accounted for [36].

310  
311 Perhaps most importantly, SiCTeC offers a highly affordable, flexible, reusable  
312 alternative that can be constructed by nearly any lab. Our device has many use cases,  
313 such as on-the-fly temperature changes and more complex, programmable temperature  
314 changes. Sample temperature can be varied in a stepwise fashion (Fig. 3) or driven in  
315 oscillations (Fig. 5); while the consequences of both of these perturbations have yet to be  
316 fully explored, here we discovered that during temperature oscillations *E. coli* cells  
317 experience a much faster acceleration of growth during the second temperature upshift  
318 than during the first (Fig. 5C). By employing open-source components and software,  
319 this design also allows for customizable and user-specific needs. Fundamentally, this  
320 design makes a minimal alteration to the traditional (and inexpensive) agarose pad

321 technique familiar to microbiologists, with components collectively priced at less than  
322 \$110 (Table S1) and assembled in just a few hours.  
323  
324 For bacteria, temperature changes are unavoidable within a host (e.g. fever) and in the  
325 environment (diurnal cycles and climate change on short and long timescales,  
326 respectively). Yet, we know little about how key processes such as bacterial responses to  
327 antibiotics depend on temperature. Tracking single-cell dynamics is often critical to  
328 understanding how cells respond to environmental perturbations. For instance, *E. coli*  
329 cells grow more slowly at steady-state at high osmolarity, yet maintain their growth  
330 rate immediately after an increase in medium osmolarity [37], demonstrating that  
331 turgor pressure does not determine growth rate (despite the decrease in steady-state  
332 growth rate as osmolarity increases). In this capacity, SiCTeC has the potential to spur  
333 future studies of the temperature dependence of cellular physiology in a wide variety of  
334 organisms. Agarose pads can be used to modify the nutrient and chemical environment,  
335 and the modification of pad stiffness provides the ability to examine the impact of  
336 mechanics on cellular responses to temperature changes. Temperature can even be used  
337 to modulate the stiffness of a hydrogel [38], enabling the study of how cells adapt to  
338 dynamic substrate mechanics. With a simple extension of our design, we anticipate that  
339 a similar Peltier-based strategy can be incorporated into a microfluidic platform [39],  
340 enabling both long-term imaging (e.g. repeated oscillations) and chemical perturbations

341 throughout a single temperature-shift experiment. The straightforward and inexpensive  
342 construction of our device should facilitate addressing many important questions across  
343 organisms that inhabit environments whose temperatures are well-regulated (e.g. the  
344 mammalian gut) and fluctuating (e.g. soil).

## 345   **METHODS**

346

### 347   **Strains and cell culture**

348   The *E. coli* strains used in this study were MG1655, *ftsI730* (JE7611, PBP3ts) [40], and  
349   *pbpA45* (SP4500, PBP2ts) [41]. All experiments were carried out in rich medium  
350   (lysogeny broth, LB).

351

352   Wild-type cells were inoculated directly into LB from frozen stocks and grown  
353   overnight at 37 °C, then diluted 1:200 into fresh LB and grown for 2 h at the desired  
354   temperature. For temperature-shift experiments, cells were diluted 1:10 twice at the  
355   initial temperature to establish steady-state growth.

356

357   PBPs strains were grown from frozen stocks overnight at 30 °C, diluted 1:100 into fresh  
358   LB, and grown for 4 h (due to their slower growth rates). Cells were then diluted 1:10  
359   twice to establish steady-state growth before shifting to the non-permissive  
360   temperature.

361

### 362   **Thermistor calibration**

363   From 20 °C to 50 °C, thermistor temperature  $T$  is approximately related to the resistance  
364    $R$  through the equation  $\frac{1}{T} = A + B \ln R$ . Thus, we estimated  $B$  based on pairwise

365 measurements at two temperatures  $T_1$  and  $T_2$  using the equation  $B = \ln \left( \frac{R(T_1)}{R(T_2)} \right) / \left( \frac{1}{T_1} - \frac{1}{T_2} \right)$ .

366 The resistances at 4, 22, 30, and 37 °C were 274, 114, 81, and 60 kΩ, respectively. The

367 average estimate of  $B$  across all pairwise combinations was 3950 °C<sup>-1</sup>, suggesting that

368 the nominal resistance at 25 °C was close to 100 kΩ, in agreement with the

369 manufacturer's specifications ([https://www.makeralot.com/download/Reprap-Hotend-](https://www.makeralot.com/download/Reprap-Hotend-Thermistor-NTC-3950-100K.pdf)

370 [Thermistor-NTC-3950-100K.pdf](https://www.makeralot.com/download/Reprap-Hotend-Thermistor-NTC-3950-100K.pdf)). Measurements were in close agreement with a highly

371 sensitive thermocouple (Omega Engineering).

372

### 373 **Sample preparation and imaging**

374 LB-agarose pads were prepared by boiling 1.5% or 3% ultrapure agarose (Sigma

375 Aldrich) in LB, then pipetting 150 μL of liquid agarose medium into a silicone gasket

376 (Grace Bio-Labs) on a glass slide, which was compressed with another glass slide. The

377 pad was allowed to solidify at the initial temperature for shift experiments. Typically,

378 the microscope was kept at the initial temperature using a temperature-controlled

379 microscope enclosure (Haison Technology).

380

381 One microliter of cells at the initial temperature was placed onto the center of the pad

382 and allowed to dry at the initial temperature before placing a coverslip on the pad. The

383 thermistor was sealed on the coverslip with thermal tape. The device was placed onto

384 the microscope slide mount, and leads from the electrical control components were

385 attached. During time-lapse imaging, the temperature readout and PWM signal were  
386 visualized in real time using the open-source software Processing v. 3.5.4. All relevant  
387 data from the device were saved as a .csv file upon exit from the visualization tool.

388  
389 Samples were imaged in phase-contrast using a Ti-Eclipse stand (Nikon Instruments)  
390 with a 40X Ph2 air objective (NA: 0.95) (Nikon Instruments) along with a 1.5X tube lens,  
391 or a 100X Ph3 oil-immersion objective (NA: 1.45) (Nikon Instruments). Images were  
392 acquired using a Zyla 4.2 sCMOS camera (Andor Technology); time-lapse images were  
393 acquired every 30 s. The microscope system was integrated using  $\mu$ Manager v. 1.41 [42].

394

### 395 **Image analysis**

396 To account for the drift that can occur during temperature shifts (data not shown), time-  
397 lapse data were aligned using the Template-Matching plugin [43] in ImageJ [44]. These  
398 aligned images were segmented by the deep neural network-based machine learning  
399 framework *DeepCell* [45]. To train the network, approximately 200 cells were manually  
400 outlined to produce a training dataset for our specific imaging conditions. Trained  
401 networks were used to generate binary images for feature (extracellular/cell  
402 perimeter/cytoplasm) identification. These images were used as the input for gradient  
403 segmentation in *Morphometrics* v. 1.1 [46] to define cell contours at sub-pixel resolution.  
404 Custom MATLAB (Mathworks) scripts were used to track individual cells, and to

405 measure the centerline of rod-shaped cells to calculate cellular geometries [47]. Growth  
406 rate was defined as the time-derivative of the logarithm of cell length, and growth-rate  
407 trajectories were binned to show population-average behaviors.



408 **Author Contributions**

409 B.D.K., L.Z., and K.C.H. designed the research; B.D.K. and L.Z. performed the research;  
410 B.D.K. and L.Z. analyzed the data; and B.D.K., L.Z., and K.C.H. wrote the manuscript.

411

412 **Acknowledgments**

413 The authors thank members of the Huang lab and George Korir for helpful discussions,  
414 and Paul Rujigrok, Heidi Arjes, and Fred Chang for comments on the manuscript. The  
415 authors acknowledge funding from the Allen Discovery Center at Stanford on Systems  
416 Modeling of Infection (to K.C.H). K.C.H. is a Chan Zuckerberg Biohub Investigator.

417 **FIGURES**

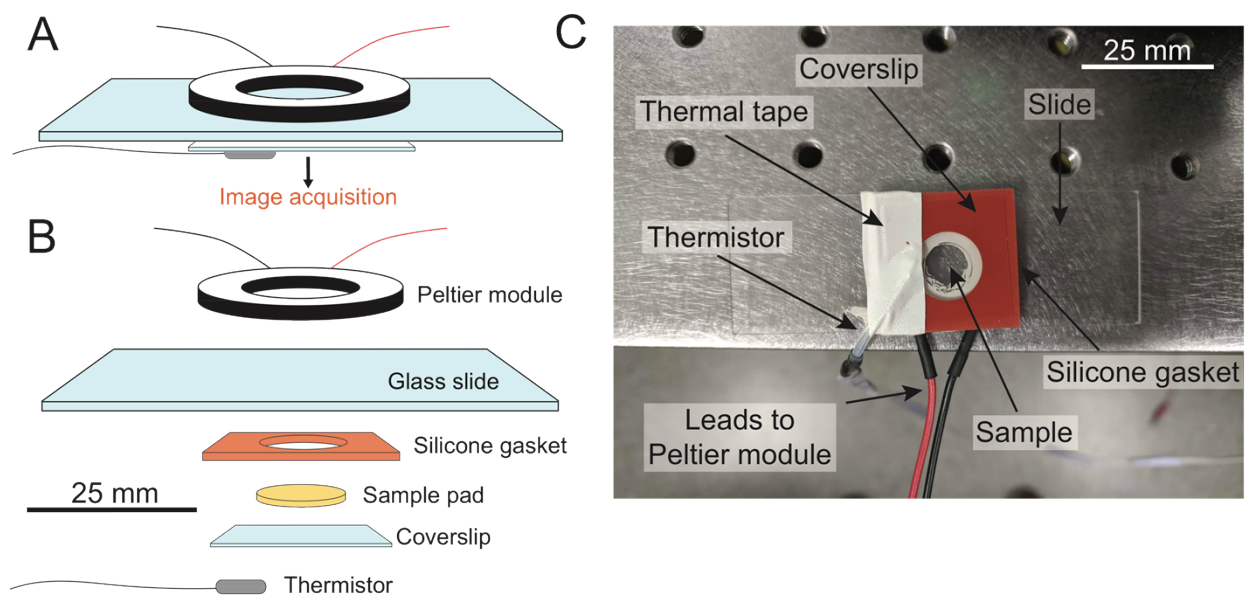

419 **Figure 1: SiCTeC: an easy-to-assemble temperature controller for single-cell imaging.**

- 420 A) Schematic of a temperature-controlled sample slide. A ring-shaped Peltier  
421 module delivers heat to the sample, and the temperature is monitored at the  
422 coverslip using a thermistor. Images of cells can be acquired using most  
423 microscopy systems, and processed using automated segmentation and tracking  
424 algorithms.
- 425 B) Exploded schematic of the slide in (A).
- 426 C) Photo of sample slide with Peltier module and thermistor. The thermistor is  
427 sealed to the coverslip with thermal tape, and power is delivered to the Peltier  
428 module using electronic control components (not shown).

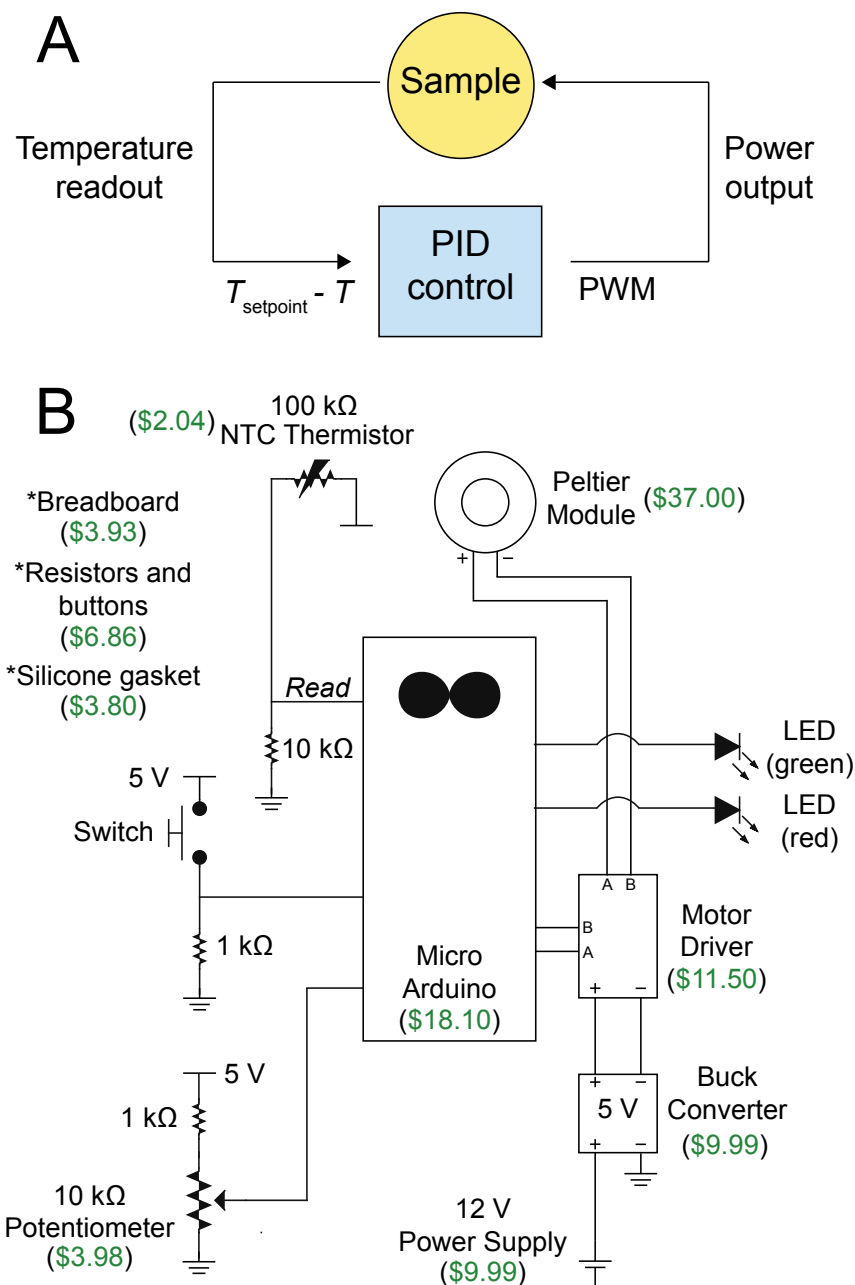

429

430 **Figure 2: Design of an inexpensive control system.**

431 A) Control design for proportional-integral-derivative (PID) temperature control.

432 The temperature ( $T$ ) is read by the thermistor at the coverslip, and its difference

433 with respect to the setpoint ( $T_{\text{setpoint}}$ ) is used as an input to the PID algorithm.

434 Pulse-width-modulation (PWM) signals are used to modulate the power input to

435 the Peltier module.

436 B) Circuit design for the temperature-control system. Components are labeled with

437 their estimated itemized price in US dollars. Asterisks indicate items not shown.

438 The total cost is ~\$107 (Table S1).

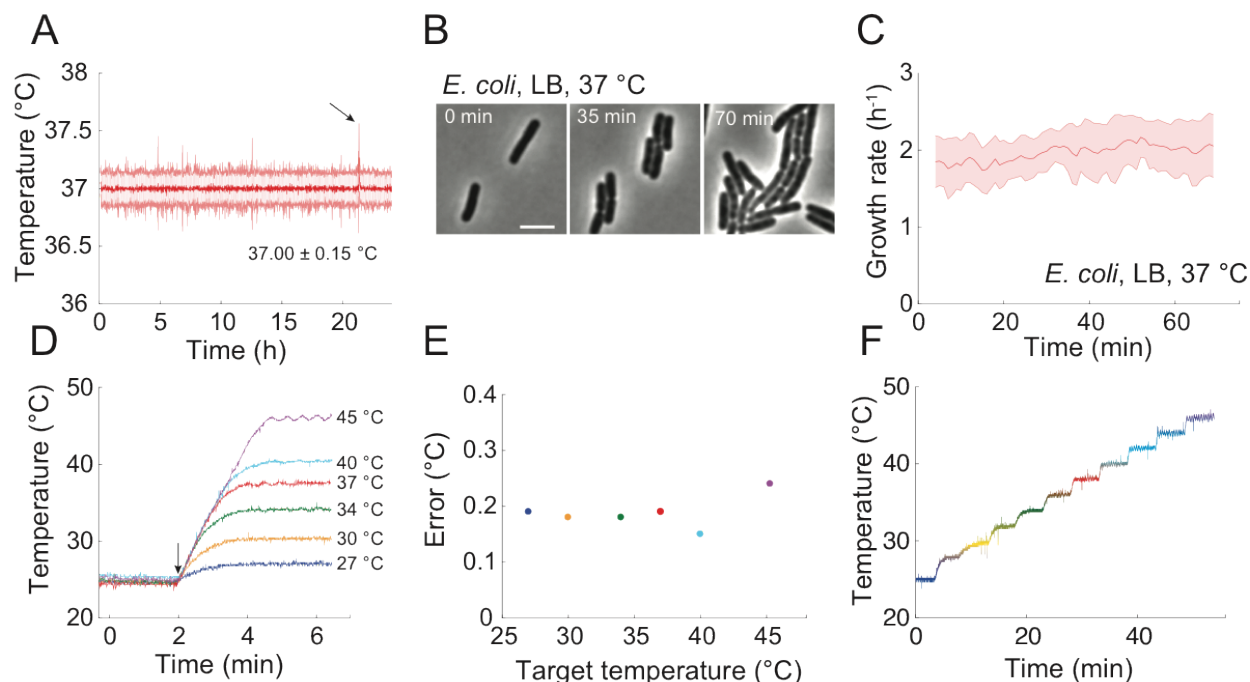

439

440 **Figure 3: SiCTeC can maintain a wide range of temperatures with very small**

441 **fluctuations.**

442 A) Temperature readout during maintenance of a sample at 37 °C for 24 h. The  
443 temperature was binned every 1 min; the shaded region represents ± 1 standard  
444 deviation. Arrow points to the most extreme outlier (0.6 °C).

445 B) Time-lapse images of *E. coli* grown on an agarose pad maintained at 37 °C using  
446 SiCTeC as monitored in (A). Cell morphology and viability were maintained  
447 throughout 70 min of tracking. LB, lysogeny broth. Scale bar: 4 μm.

448 C) Population-averaged growth rate of *E. coli* cells was approximately constant  
449 during 70 min of maintenance at 37 °C as monitored in (A). Shaded region  
450 represents ± 1 standard deviation ( $n = 301$  cells).

- 451 D) Temperature-shift experiments from 25 °C demonstrate rapid equilibration at  
452 target temperatures of 27-45 °C. The device was maintained at 25 °C for 2  
453 minutes and then shifted to the target temperature. Arrow indicates time of shift.
- 454 E) The error in temperature maintenance was less than 0.3 °C at each target  
455 temperature in (D), defined as the standard deviation over 3-min windows.
- 456 F) Temperature stepping experiment from 25 °C to 46 °C demonstrates the ability of  
457 SiCTeC to achieve near arbitrary upshift waveforms. The initial step was to 28  
458 °C, while all subsequent steps were increments of 2 °C at 5-min intervals.

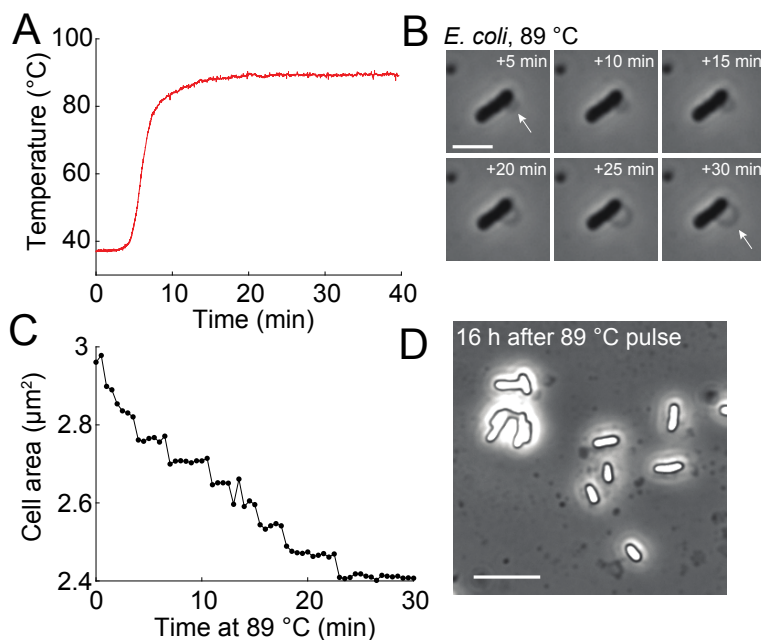

459

460 **Figure 4: SiCTeC enables extended imaging at thermophilic temperatures.**

461 A) Temperature of an *E. coli* sample undergoing a shift from 37 °C to 89 °C, the  
462 maximum temperature allowed by the device at PWM = 50. The system achieved  
463 a steady state after 7 min. Scale bar: 3 μm.

464 B) Time-lapse imaging of an *E. coli* cell at 89 °C for 30 min revealed halting of  
465 growth and blebbing (arrows).

466 C) The cross-sectional area of the cell in (B) shrank progressively while temperature  
467 was maintained at 89 °C.

468 D) Phase-contrast image of cells 16 h after a 30-min pulse at 89 °C reveals phase-  
469 bright interior indicative of the unfolded protein response [27]. Scale bar: 8 μm.

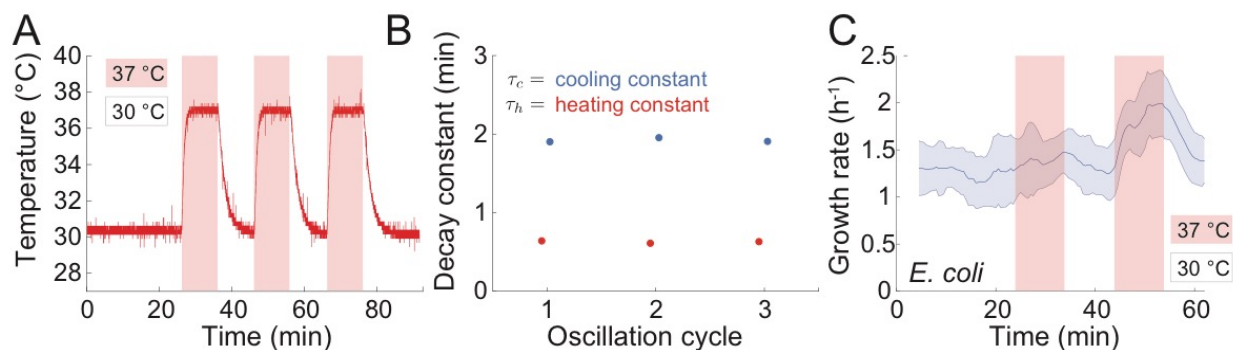

470

471 **Figure 5: Temperature oscillations with programmable and repeatable waveforms**

472 **reveal rapid adaptation of *E. coli* to temperature shifts.**

473 A) *E. coli* cells were subjected to 3 cycles of oscillations with 20-min period between

474 30 °C and 37 °C. Downshifts from 37 °C to 30 °C were achieved through passive

475 cooling. The waveform remained the same shape throughout all three cycles.

476 B) Heating and passive cooling were repeatable and rapid in each cycle in (A). The

477 cooling constant ( $\tau_c$ , blue) was obtained by fitting a normalized exponential

478 function ( $1-\exp(-t/\tau)$ ) to each transition from 37 °C to 30 °C; the heating constant

479 ( $\tau_h$ , red) was obtained by fitting the function  $\exp(-t/\tau)$  to each transition from 30

480 °C to 37 °C. Error bars (95% confidence intervals) are smaller than the data

481 markers.

482 C) *E. coli* cells can rapidly adapt their growth rate to temperature oscillations.

483 Growth rate of *E. coli* cells on LB agarose pads subjected to temperature

484 oscillations between 30 °C and 37 °C exhibited a faster increase in growth rate in

485 the second up- and downshift cycle compared with the first cycle, indicating

486 rapid adaptation to the oscillations. The red and blue shaded regions represent



487 temperature upshifts and downshifts, respectively. Shaded region represents  $\pm 1$   
488 standard deviation ( $n = 588$  cells).

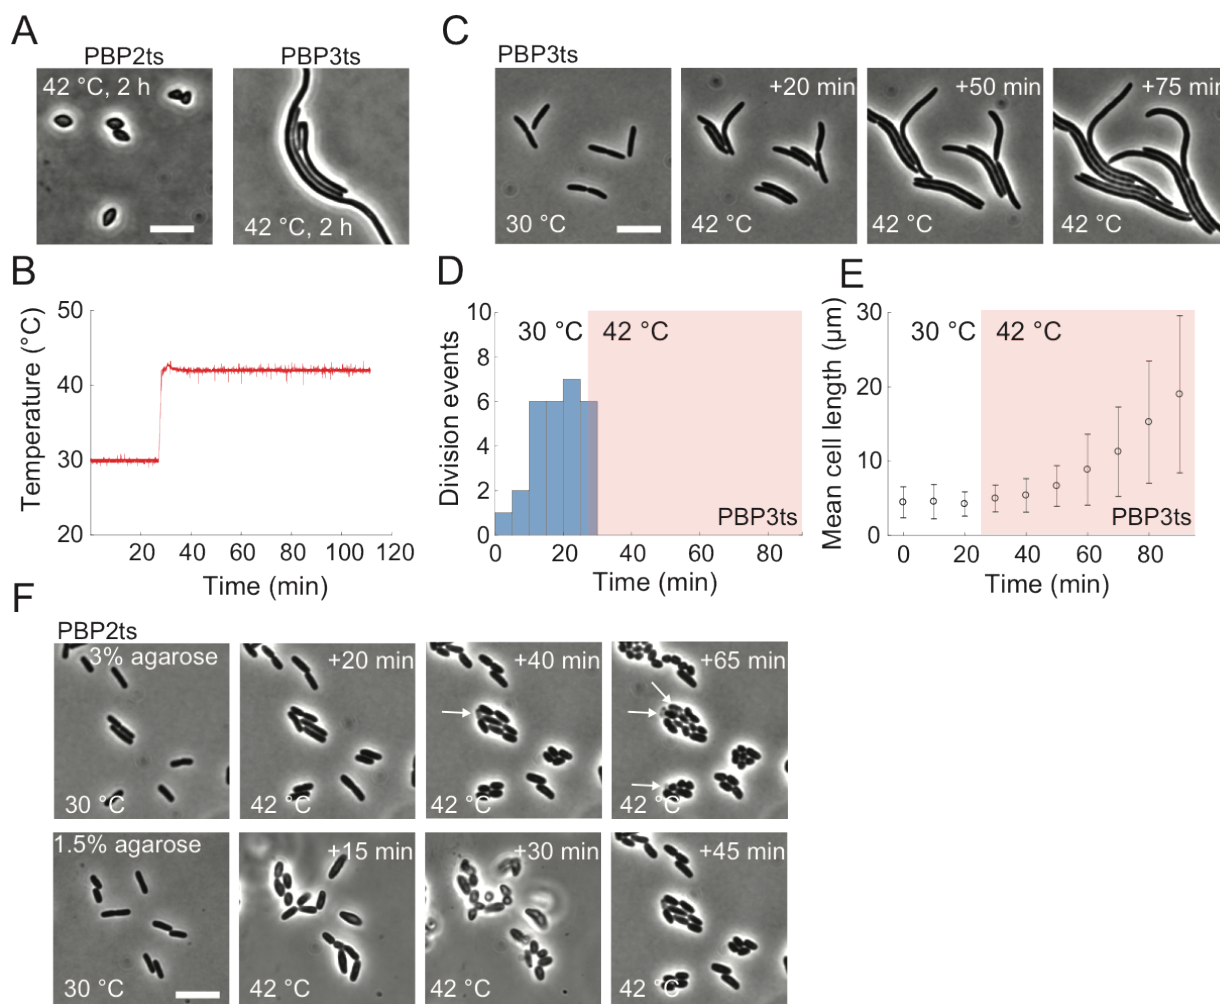

489

490 **Figure 6: SiCTeC enables quantification of temperature-sensitive phenotypes**  
491 **during transitions to non-permissive temperatures.**

492 A) After 2 h of growth in liquid at the non-permissive temperature 42 °C,  
493 temperature sensitive (ts) mutants of the cell wall synthesis enzymes PBP2 (left,  
494 strain SP4500) and PBP3 (right, strain JE7611) adopted football-shaped and  
495 filamentous morphologies due to inhibition of the elongasome and divisome,  
496 respectively. Scale bar: 8 µm.

- 497 B) SiCTeC supported the desired temperature profile, as indicated by the  
498 temperature readout while shifting PBP2ts cells from its permissive temperature  
499 (30 °C) to 42 °C.
- 500 C) After a shift from 30 °C to 42 °C, PBP3ts cells rapidly halted division and  
501 elongated filamentously, as expected due to inhibition of cell division. Scale bar:  
502 8 μm.
- 503 D) Division events of PBP3ts cells, binned into 5-min windows, were only observed  
504 during growth at 30 °C or almost immediately after the shift to 42 °C ( $n = 33$  total  
505 division events).
- 506 E) Mean cell length of PBP3ts cells increased continuously throughout the shift  
507 from 30 °C to 42 °C ( $n = 31-40$  cells per data point).
- 508 F) PBP2ts mutants are sensitive to hydrogel stiffness. After a shift from 30 °C to 42  
509 °C, the PBP2ts mutant grown on 3% agarose pads (top) remained approximately  
510 rod-shaped rather than adopting the rounded phenotype in (A), and a  
511 subpopulation of cells lysed (arrows). By contrast, cells grown on 1.5% agarose  
512 pads (bottom) became football-shaped as in (A) within 30 min, without  
513 noticeable cell lysis. Scale bar: 8 μm.

514 **REFERENCES**

515

516 1. Rojas ER, Billings G, Odermatt PD, Auer GK, Zhu L, Miguel A, et al. The outer  
517 membrane is an essential load-bearing element in Gram-negative bacteria. *Nature*.

518 2018;559(7715):617-21. doi: 10.1038/s41586-018-0344-3. PubMed PMID: 30022160;

519 PubMed Central PMCID: PMC6089221.

520 2. Ting SY, Bosch DE, Mangiameli SM, Radey MC, Huang S, Park YJ, et al.

521 Bifunctional Immunity Proteins Protect Bacteria against FtsZ-Targeting ADP-

522 Ribosylating Toxins. *Cell*. 2018;175(5):1380-92 e14. doi: 10.1016/j.cell.2018.09.037.

523 PubMed PMID: 30343895; PubMed Central PMCID: PMC6239978.

524 3. Li G, Moore JK. Microtubule dynamics at low temperature: evidence that tubulin

525 recycling limits assembly. *Molecular Biology of the Cell*. 2020;0(0):mbc.E19-1-0634. doi:

526 10.1091/mbc.E19-11-0634. PubMed PMID: 32213119.

527 4. Zimmerle CT, Frieden C. Effect of temperature on the mechanism of actin

528 polymerization. *Biochemistry*. 1986;25(21):6432-8. doi: 10.1021/bi00369a014. PubMed

529 PMID: 3790531.

530 5. Ryals J, Little R, Bremer H. Temperature dependence of RNA synthesis

531 parameters in *Escherichia coli*. *J Bacteriol*. 1982;151(2):879-87. PubMed PMID: 6178724;

532 PubMed Central PMCID: PMC6220338.

- 533 6. Kong H, Kucera RB, Jack WE. Characterization of a DNA polymerase from the  
534 hyperthermophile archaea *Thermococcus litoralis*. Vent DNA polymerase, steady state  
535 kinetics, thermal stability, processivity, strand displacement, and exonuclease activities.  
536 *J Biol Chem.* 1993;268(3):1965-75. PubMed PMID: 8420970.
- 537 7. Farewell A, Neidhardt FC. Effect of temperature on in vivo protein synthetic  
538 capacity in *Escherichia coli*. *J Bacteriol.* 1998;180(17):4704-10. PubMed PMID: 9721314;  
539 PubMed Central PMCID: PMCPMC107486.
- 540 8. Elias M, Wieczorek G, Rosenne S, Tawfik DS. The universality of enzymatic rate-  
541 temperature dependency. *Trends Biochem Sci.* 2014;39(1):1-7. doi:  
542 10.1016/j.tibs.2013.11.001. PubMed PMID: 24315123.
- 543 9. Dill KA, Ghosh K, Schmit JD. Physical limits of cells and proteomes. *Proc Natl*  
544 *Acad Sci U S A.* 2011;108(44):17876-82. doi: 10.1073/pnas.1114477108. PubMed PMID:  
545 22006304; PubMed Central PMCID: PMCPMC3207669.
- 546 10. Herendeen SL, VanBogelen RA, Neidhardt FC. Levels of major proteins of  
547 *Escherichia coli* during growth at different temperatures. *J Bacteriol.* 1979;139(1):185-94.  
548 PubMed PMID: 156716; PubMed Central PMCID: PMCPMC216844.
- 549 11. Barber MA. The Rate of Multiplication of *Bacillus Coli* at Different Temperatures.  
550 *The Journal of Infectious Diseases.* 1908;5(4):379-400. doi: 10.1093/infdis/5.4.379.

- 551 12. Chohji T, Sawada T, Kuno S. Effects of temperature shift on growth rate of  
552 *Escherichia coli* BB at lower glucose concentration. *Biotechnol Bioeng.* 1983;25(12):2991-  
553 3003. doi: 10.1002/bit.260251215. PubMed PMID: 18548633.
- 554 13. Lemaux PG, Herendeen SL, Bloch PL, Neidhardt FC. Transient rates of synthesis  
555 of individual polypeptides in *E. coli* following temperature shifts. *Cell.* 1978;13(3):427-  
556 34. doi: 10.1016/0092-8674(78)90317-3. PubMed PMID: 350413.
- 557 14. Byagathvalli G, Sinha S, Zhang Y, Styczynski MP, Standeven J, Bhamla MS.  
558 ElectroPen: An ultra-low-cost, electricity-free, portable electroporator. *PLoS Biol.*  
559 2020;18(1):e3000589. doi: 10.1371/journal.pbio.3000589. PubMed PMID: 31922526;  
560 PubMed Central PMCID: PMC6953602.
- 561 15. Maia Chagas A, Prieto-Godino LL, Arrenberg AB, Baden T. The euro100 lab: A  
562 3D-printable open-source platform for fluorescence microscopy, optogenetics, and  
563 accurate temperature control during behaviour of zebrafish, *Drosophila*, and  
564 *Caenorhabditis elegans*. *PLoS Biol.* 2017;15(7):e2002702. doi:  
565 10.1371/journal.pbio.2002702. PubMed PMID: 28719603; PubMed Central PMCID:  
566 PMC65515398.
- 567 16. Oberacker P, Stepper P, Bond DM, Hohn S, Focken J, Meyer V, et al. Bio-On-  
568 Magnetic-Beads (BOMB): Open platform for high-throughput nucleic acid extraction  
569 and manipulation. *PLoS Biol.* 2019;17(1):e3000107. doi: 10.1371/journal.pbio.3000107.  
570 PubMed PMID: 30629605; PubMed Central PMCID: PMC6343928 Ltd), at which

- 571 some BOMB protocols were developed and have been donated to this project. SRH is  
572 director of an agricultural engineering firm (CENENG Ltd).
- 573 17. Maia Chagas A. Haves and have nots must find a better way: The case for open  
574 scientific hardware. PLoS biology. 2018;16(9):e3000014-e. doi:  
575 10.1371/journal.pbio.3000014. PubMed PMID: 30260950.
- 576 18. Venezia P. Linux at 25: How Linux changed the world. InfoWorld. 2016.
- 577 19. Young JW, Locke JC, Altinok A, Rosenfeld N, Bacarian T, Swain PS, et al.  
578 Measuring single-cell gene expression dynamics in bacteria using fluorescence time-  
579 lapse microscopy. Nat Protoc. 2011;7(1):80-8. doi: 10.1038/nprot.2011.432. PubMed  
580 PMID: 22179594; PubMed Central PMCID: PMC4161363.
- 581 20. Seifert W, Pluschke V, Hinsche NF. Thermoelectric cooler concepts and the limit  
582 for maximum cooling. J Phys Condens Matter. 2014;26(25):255803. doi: 10.1088/0953-  
583 8984/26/25/255803. PubMed PMID: 24899626.
- 584 21. Kiam Heong A, Chong G, Yun L. PID control system analysis, design, and  
585 technology. IEEE Transactions on Control Systems Technology. 2005;13(4):559-76. doi:  
586 10.1109/TCST.2005.847331.
- 587 22. Fry B. Processing: programming for the media arts. AI & Society. 2006;20(4):526-  
588 38. PubMed PMID: 22054908.
- 589 23. Tuson HH, Auer GK, Renner LD, Hasebe M, Tropini C, Salick M, et al.  
590 Measuring the stiffness of bacterial cells from growth rates in hydrogels of tunable

- 591 elasticity. *Mol Microbiol.* 2012;84(5):874-91. doi: 10.1111/j.1365-2958.2012.08063.x.
- 592 PubMed PMID: 22548341; PubMed Central PMCID: PMCPMC3359400.
- 593 24. Shi H, Colavin A, Bigos M, Tropini C, Monds RD, Huang KC. Deep Phenotypic
- 594 Mapping of Bacterial Cytoskeletal Mutants Reveals Physiological Robustness to Cell
- 595 Size. *Curr Biol.* 2017;27(22):3419-29 e4. doi: 10.1016/j.cub.2017.09.065. PubMed PMID:
- 596 29103935.
- 597 25. Wang P, Robert L, Pelletier J, Dang WL, Taddei F, Wright A, et al. Robust growth
- 598 of *Escherichia coli*. *Curr Biol.* 2010;20(12):1099-103. doi: 10.1016/j.cub.2010.04.045.
- 599 PubMed PMID: 20537537; PubMed Central PMCID: PMCPMC2902570.
- 600 26. Katsui N, Tsuchido T, Hiramatsu R, Fujikawa S, Takano M, Shibasaki I. Heat-
- 601 induced blebbing and vesiculation of the outer membrane of *Escherichia coli*. *J*
- 602 *Bacteriol.* 1982;151(3):1523-31. PubMed PMID: 7050091; PubMed Central PMCID:
- 603 PMCPMC220434.
- 604 27. Coquel AS, Jacob JP, Primet M, Demarez A, Dimiccoli M, Julou T, et al.
- 605 Localization of protein aggregation in *Escherichia coli* is governed by diffusion and
- 606 nucleoid macromolecular crowding effect. *Plos Comput Biol.* 2013;9(4):e1003038. doi:
- 607 10.1371/journal.pcbi.1003038. PubMed PMID: 23633942; PubMed Central PMCID:
- 608 PMCPMC3636022.



- 609 28. Novick P, Field C, Schekman R. Identification of 23 complementation groups  
610 required for post-translational events in the yeast secretory pathway. *Cell*.  
611 1980;21(1):205-15. doi: 10.1016/0092-8674(80)90128-2. PubMed PMID: 6996832.
- 612 29. Typas A, Banzhaf M, Gross CA, Vollmer W. From the regulation of  
613 peptidoglycan synthesis to bacterial growth and morphology. *Nat Rev Microbiol*.  
614 2011;10(2):123-36. doi: 10.1038/nrmicro2677. PubMed PMID: 22203377; PubMed Central  
615 PMCID: PMCPMC5433867.
- 616 30. Tamaki S, Matsuzawa H, Matsushashi M. Cluster of *mrda* and *mrdb* genes  
617 responsible for the rod shape and mecillinam sensitivity of *Escherichia coli*. *J Bacteriol*.  
618 1980;141(1):52-7. PubMed PMID: 6243629; PubMed Central PMCID: PMCPMC293528.
- 619 31. Spratt BG. Distinct penicillin binding proteins involved in the division,  
620 elongation, and shape of *Escherichia coli* K12. *Proc Natl Acad Sci U S A*.  
621 1975;72(8):2999-3003. doi: 10.1073/pnas.72.8.2999. PubMed PMID: 1103132; PubMed  
622 Central PMCID: PMCPMC432906.
- 623 32. Curtis NA, Eisenstadt RL, Turner KA, White AJ. Inhibition of penicillin-binding  
624 protein 3 of *Escherichia coli* K-12. Effects upon growth, viability and outer membrane  
625 barrier function. *J Antimicrob Chemother*. 1985;16(3):287-96. doi: 10.1093/jac/16.3.287.  
626 PubMed PMID: 3902760.

- 627 33. Velve Casquillas G, Fu C, Le Berre M, Cramer J, Meance S, Plecis A, et al. Fast  
628 microfluidic temperature control for high resolution live cell imaging. *Lab Chip*.  
629 2011;11(3):484-9. doi: 10.1039/c0lc00222d. PubMed PMID: 21103458.
- 630 34. Pulschen AA, Mutavchiev DR, Sebastian KN, Roubinet J, Roubinet M, Risa GT, et  
631 al. Live cell imaging of the hyperthermophilic archaeon *Sulfolobus acidocaldarius*  
632 identifies complementary roles for two ESCRTIII homologues in ensuring a robust and  
633 symmetric cell division. *bioRxiv*. 2020:2020.02.18.953042. doi: 10.1101/2020.02.18.953042.
- 634 35. Charles-Orszag A, Lord SJ, Mullins RD. High-temperature live-cell imaging of  
635 cytokinesis, cell motility and cell-cell adhesion in the thermoacidophilic crenarchaeon  
636 *Sulfolobus acidocaldarius*. *bioRxiv*. 2020:2020.02.16.951772. doi:  
637 10.1101/2020.02.16.951772.
- 638 36. Balleza E, Kim JM, Cluzel P. Systematic characterization of maturation time of  
639 fluorescent proteins in living cells. *Nat Methods*. 2018;15(1):47-51. doi:  
640 10.1038/nmeth.4509. PubMed PMID: 29320486; PubMed Central PMCID:  
641 PMC5765880.
- 642 37. Rojas E, Theriot JA, Huang KC. Response of *Escherichia coli* growth rate to  
643 osmotic shock. *P Natl Acad Sci USA*. 2014;111(21):7807-12. doi:  
644 10.1073/pnas.1402591111. PubMed PMID: WOS:000336411300068.
- 645 38. Rombouts WH, de Kort DW, Pham TT, van Mierlo CP, Werten MW, de Wolf FA,  
646 et al. Reversible Temperature-Switching of Hydrogel Stiffness of Coassembled, Silk-

- 647 Collagen-Like Hydrogels. *Biomacromolecules*. 2015;16(8):2506-13. doi:  
648 10.1021/acs.biomac.5b00766. PubMed PMID: 26175077.
- 649 39. Wu F, Dekker C. Nanofabricated structures and microfluidic devices for bacteria:  
650 from techniques to biology. *Chem Soc Rev*. 2016;45(2):268-80. doi: 10.1039/c5cs00514k.  
651 PubMed PMID: 26383019.
- 652 40. Suzuki H, Nishimura Y, Hirota Y. On the process of cellular division in  
653 *Escherichia coli*: a series of mutants of *E. coli* altered in the penicillin-binding proteins.  
654 *Proc Natl Acad Sci U S A*. 1978;75(2):664-8. doi: 10.1073/pnas.75.2.664. PubMed PMID:  
655 345275; PubMed Central PMCID: PMCPMC411316.
- 656 41. Spratt BG, Boyd A, Stoker N. Defective and plaque-forming lambda transducing  
657 bacteriophage carrying penicillin-binding protein-cell shape genes: genetic and physical  
658 mapping and identification of gene products from the lip-dacA-rodA-pbpA-leuS region  
659 of the *Escherichia coli* chromosome. *J Bacteriol*. 1980;143(2):569-81. PubMed PMID:  
660 6451612; PubMed Central PMCID: PMCPMC294316.
- 661 42. Edelstein A, Amodaj N, Hoover K, Vale R, Stuurman N. Computer control of  
662 microscopes using microManager. *Curr Protoc Mol Biol*. 2010;Chapter 14:Unit14 20. doi:  
663 10.1002/0471142727.mb1420s92. PubMed PMID: 20890901; PubMed Central PMCID:  
664 PMCPMC3065365.
- 665 43. Tseng Q, Wang I, Duchemin-Pelletier E, Azoune A, Carpi N, Gao J, et al. A new  
666 micropatterning method of soft substrates reveals that different tumorigenic signals can

667 promote or reduce cell contraction levels. *Lab Chip*. 2011;11(13):2231-40. doi:  
668 10.1039/c0lc00641f. PubMed PMID: 21523273.

669 44. Schindelin J, Arganda-Carreras I, Frise E, Kaynig V, Longair M, Pietzsch T, et al.  
670 Fiji: an open-source platform for biological-image analysis. *Nat Methods*. 2012;9(7):676-  
671 82. doi: 10.1038/nmeth.2019. PubMed PMID: 22743772; PubMed Central PMCID:  
672 PMCPMC3855844.

673 45. Van Valen DA, Kudo T, Lane KM, Macklin DN, Quach NT, DeFelice MM, et al.  
674 Deep Learning Automates the Quantitative Analysis of Individual Cells in Live-Cell  
675 Imaging Experiments. *Plos Comput Biol*. 2016;12(11). doi: ARTN e1005177  
676 10.1371/journal.pcbi.1005177. PubMed PMID: WOS:000391230900018.

677 46. Ursell T, Lee TK, Shiomi D, Shi H, Tropini C, Monds RD, et al. Rapid, precise  
678 quantification of bacterial cellular dimensions across a genomic-scale knockout library.  
679 *BMC Biol*. 2017;15(1):17. doi: 10.1186/s12915-017-0348-8. PubMed PMID: 28222723;  
680 PubMed Central PMCID: PMCPMC5320674.

681 47. Knapp BD, Odermatt P, Rojas ER, Cheng W, He X, Huang KC, et al. Decoupling  
682 of Rates of Protein Synthesis from Cell Expansion Leads to Supergrowth. *Cell Syst*.  
683 2019;9(5):434-45 e6. doi: 10.1016/j.cels.2019.10.001. PubMed PMID: 31706948; PubMed  
684 Central PMCID: PMCPMC6911364.

685

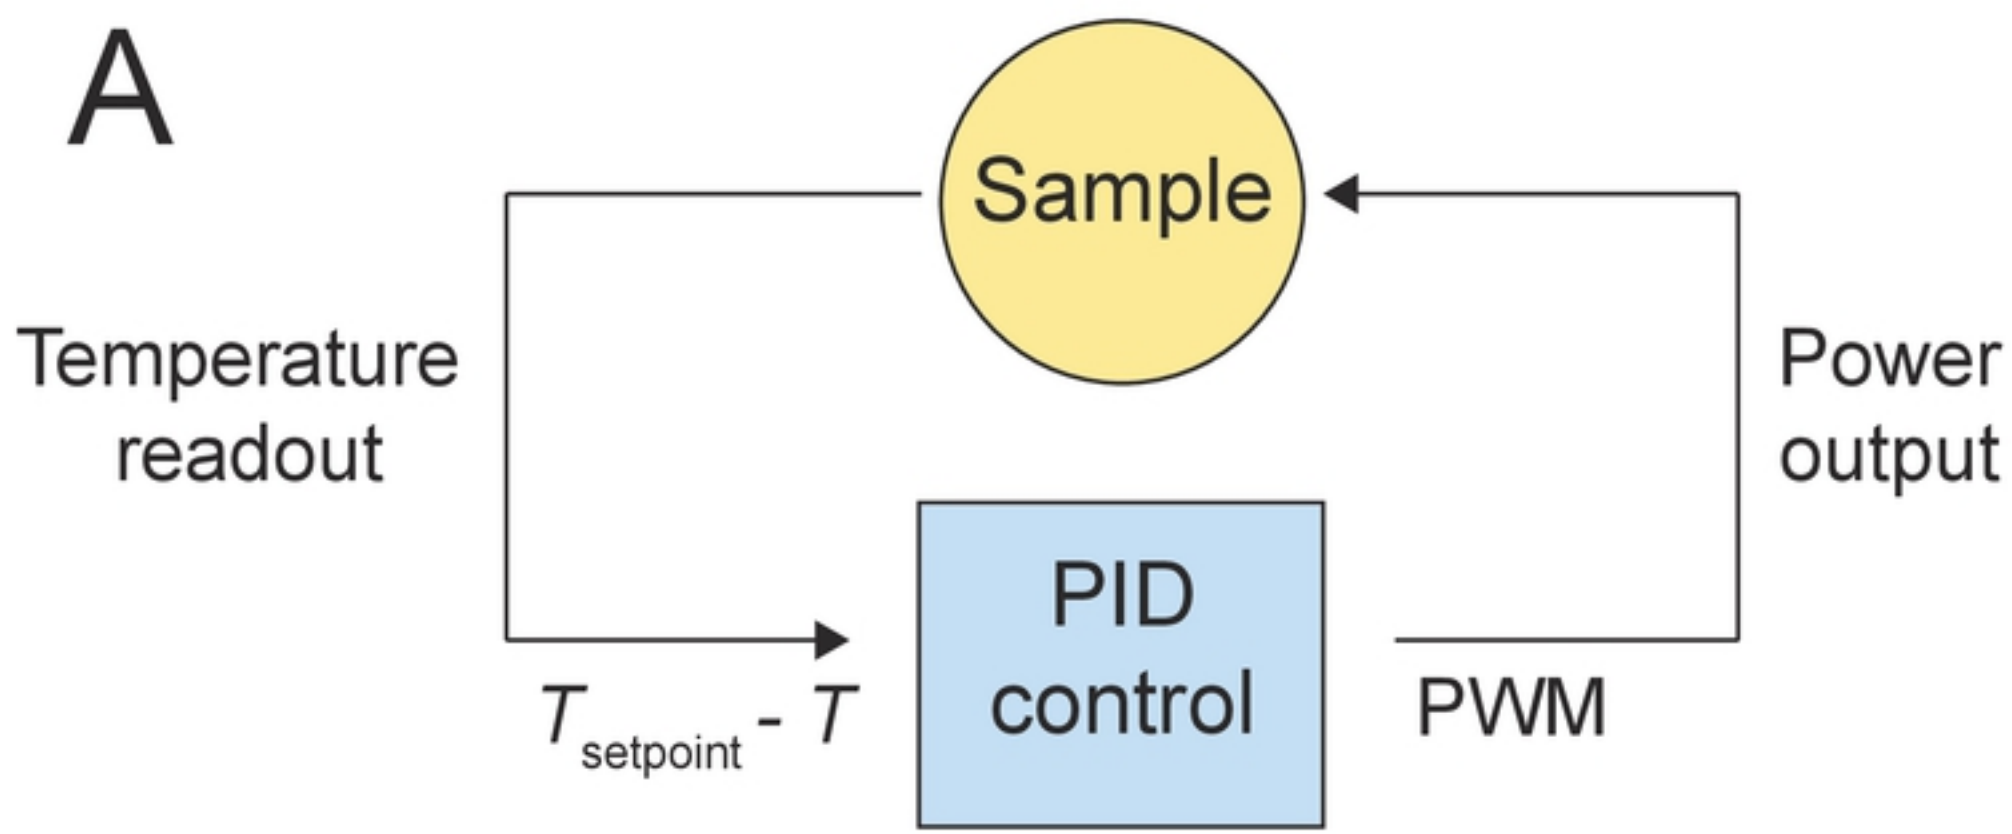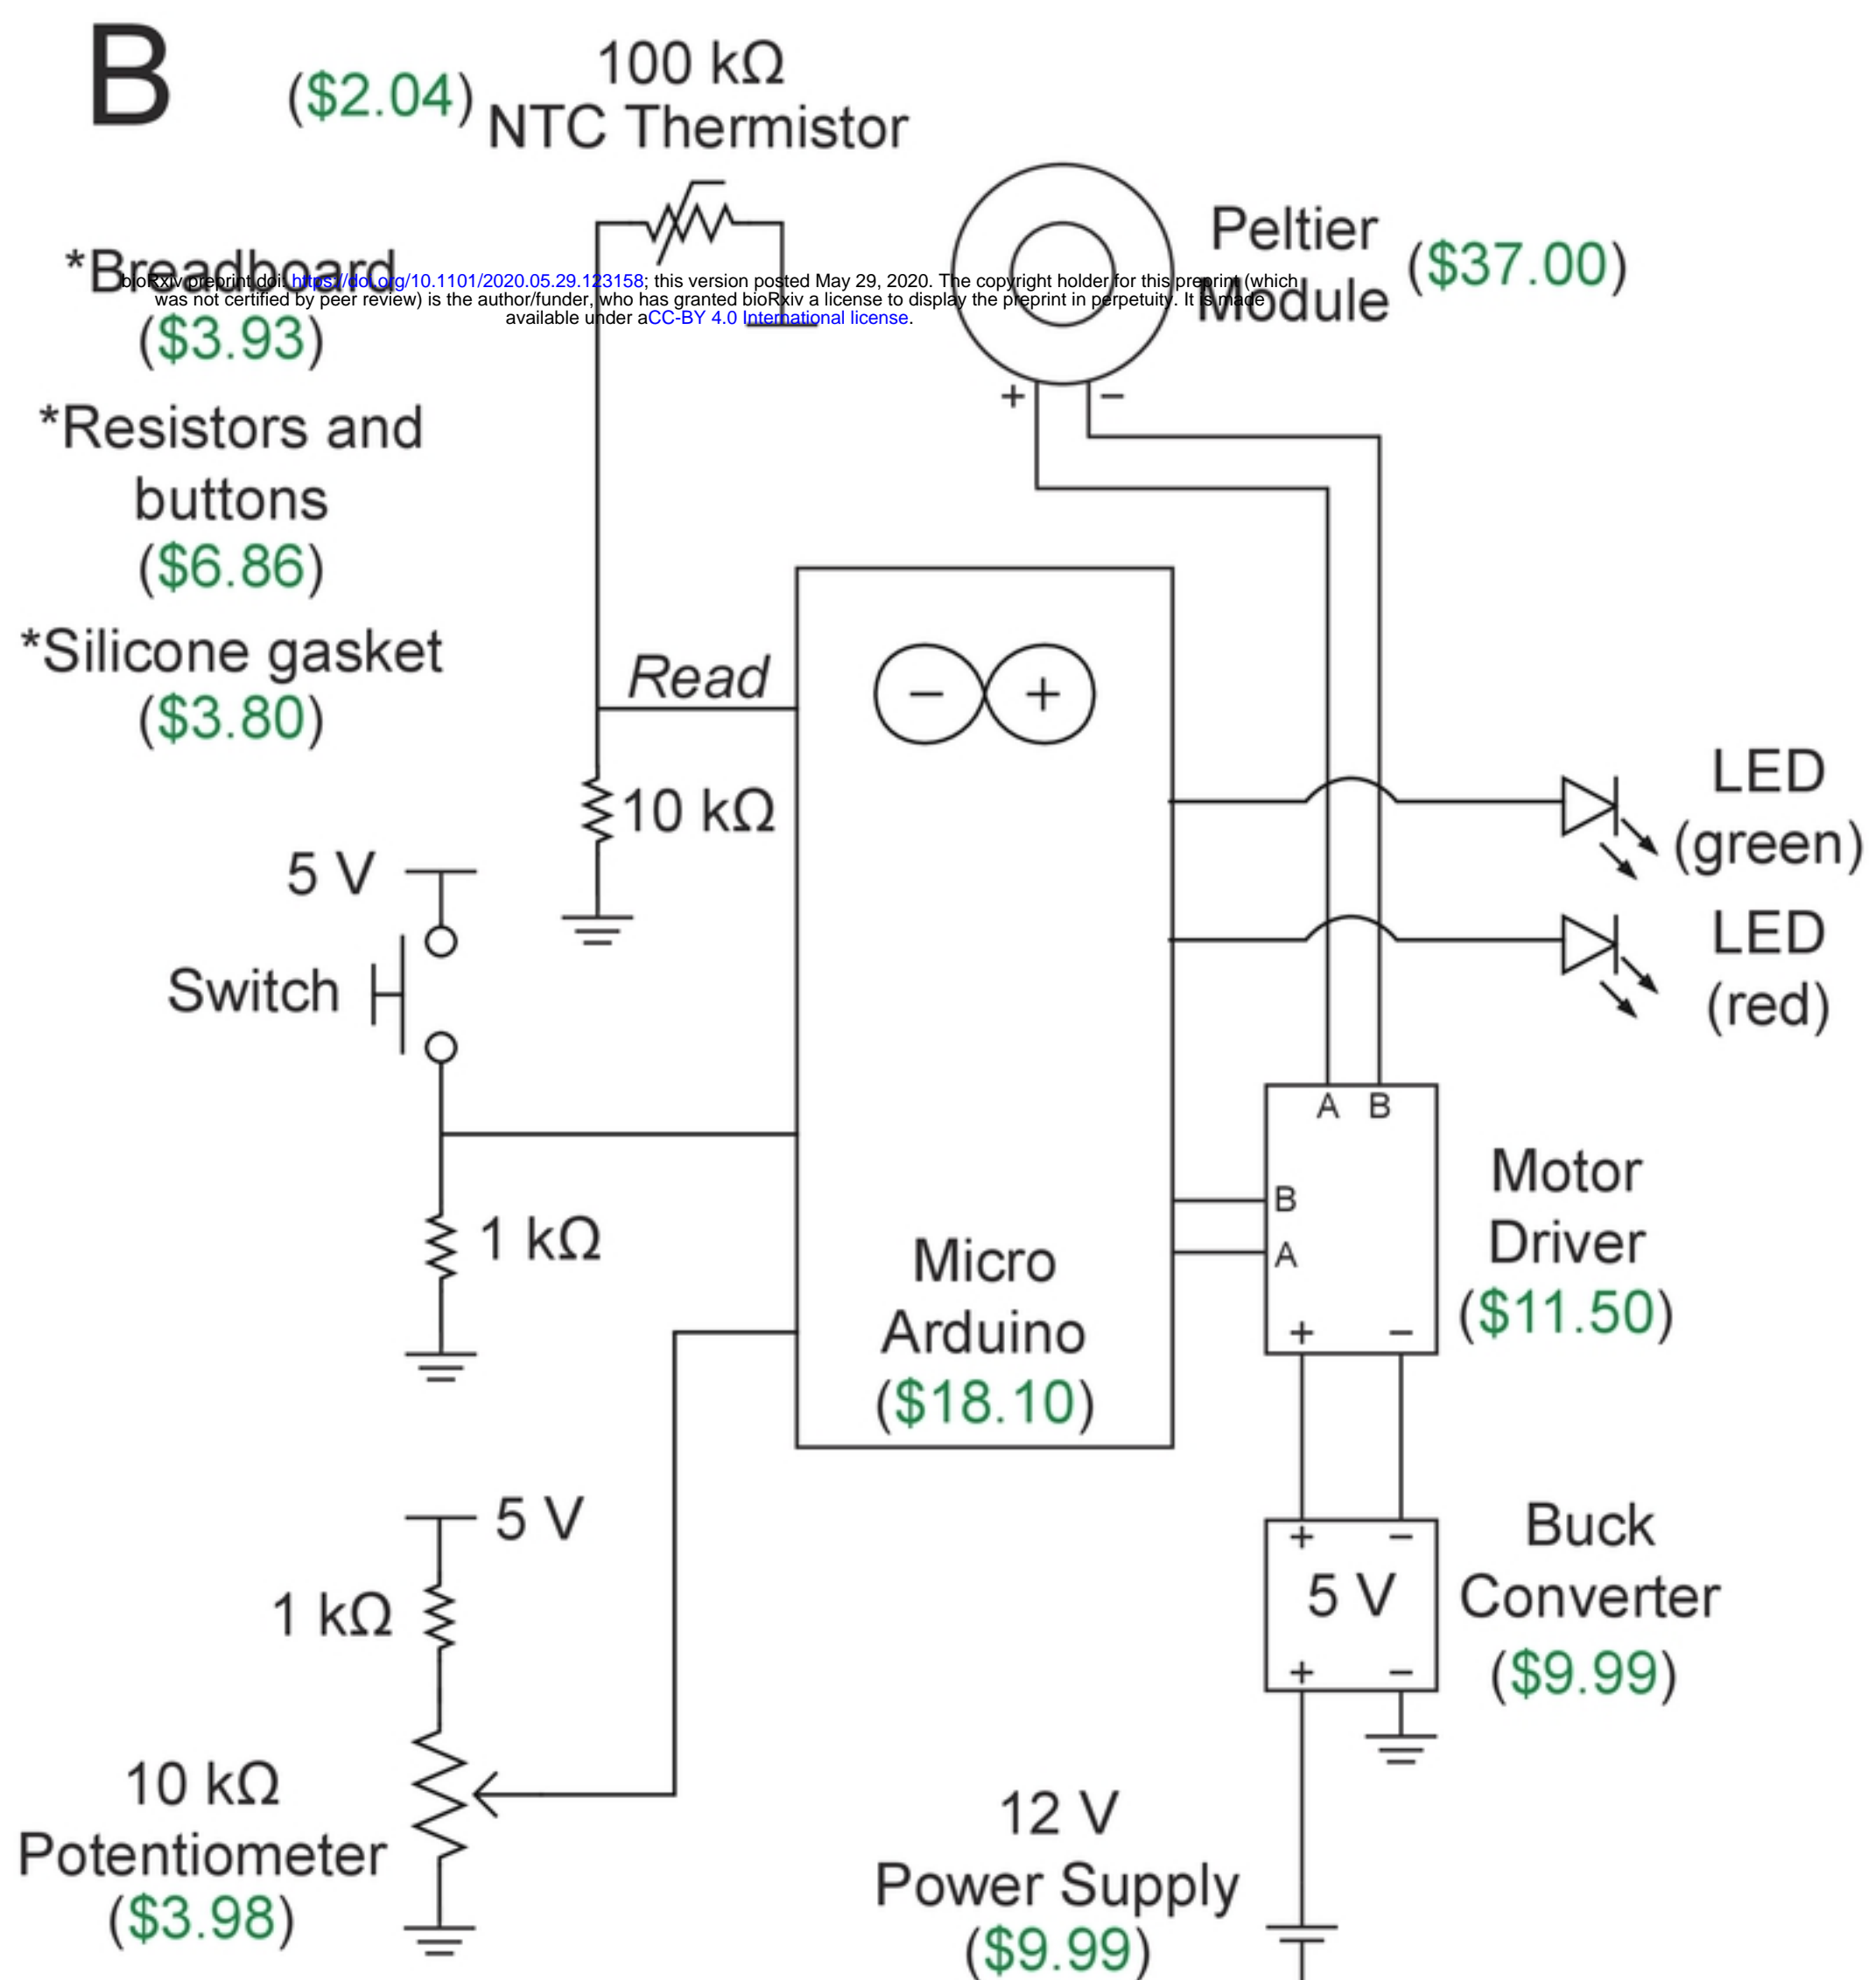

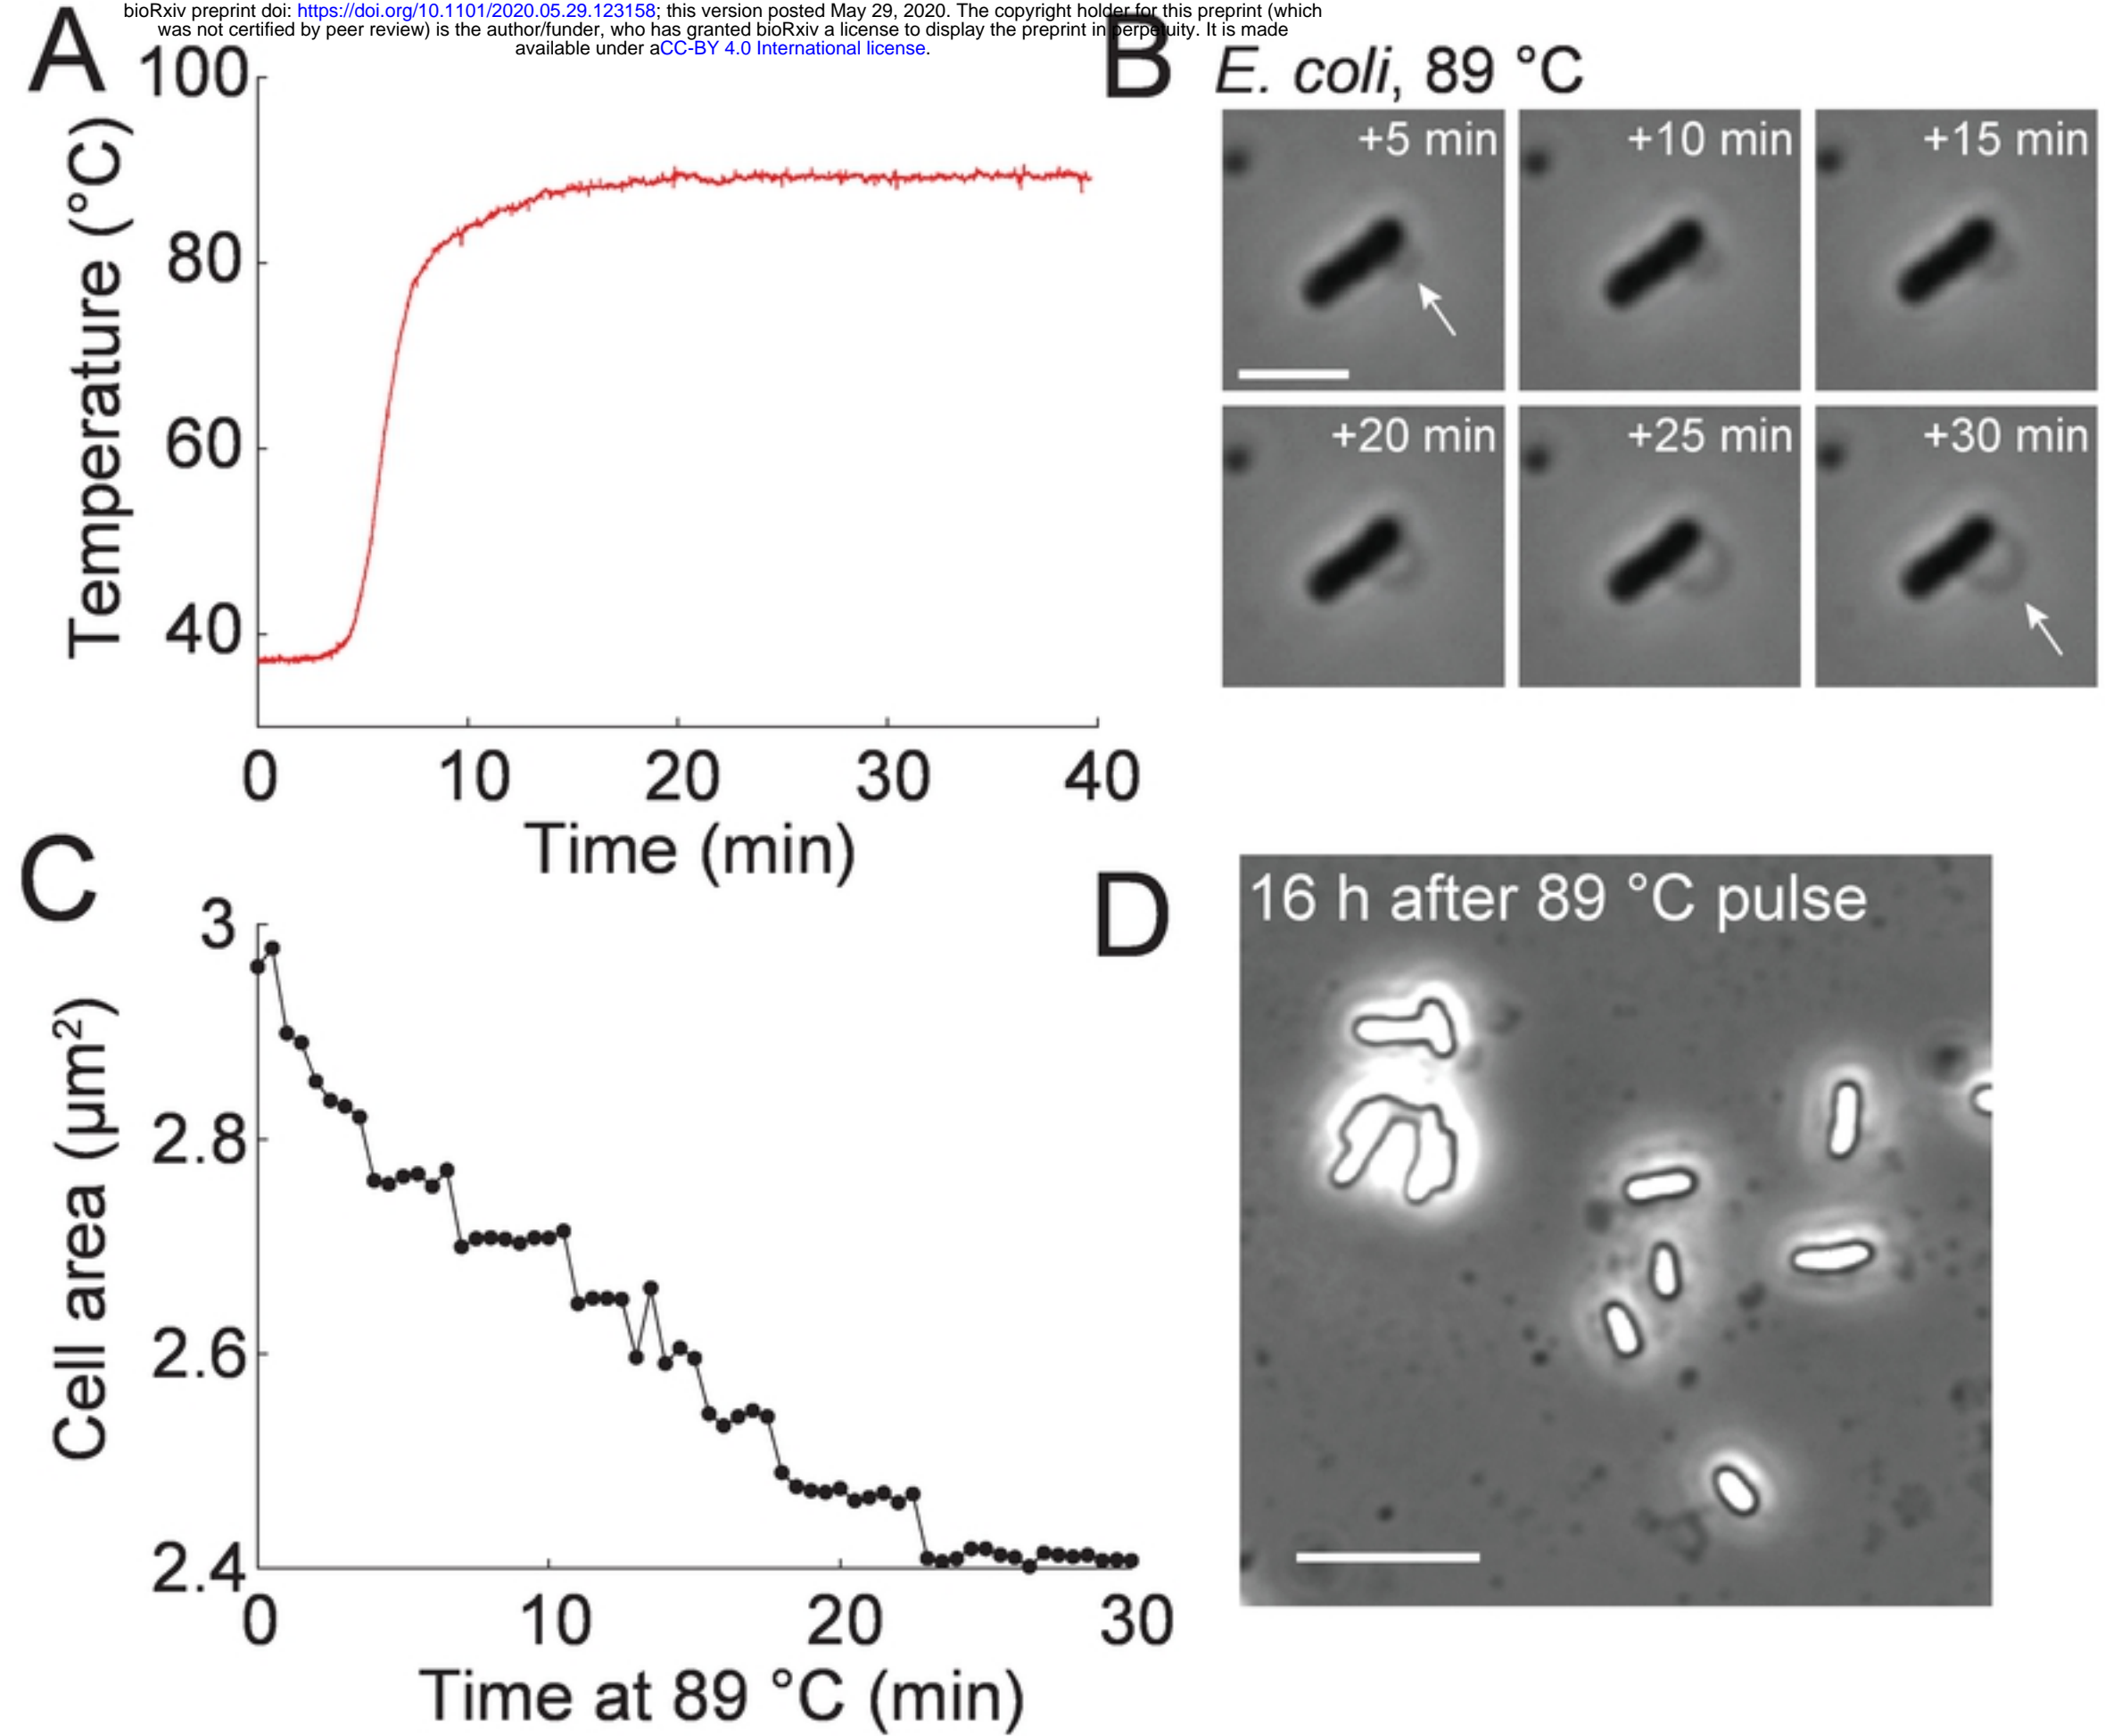

Figure 4



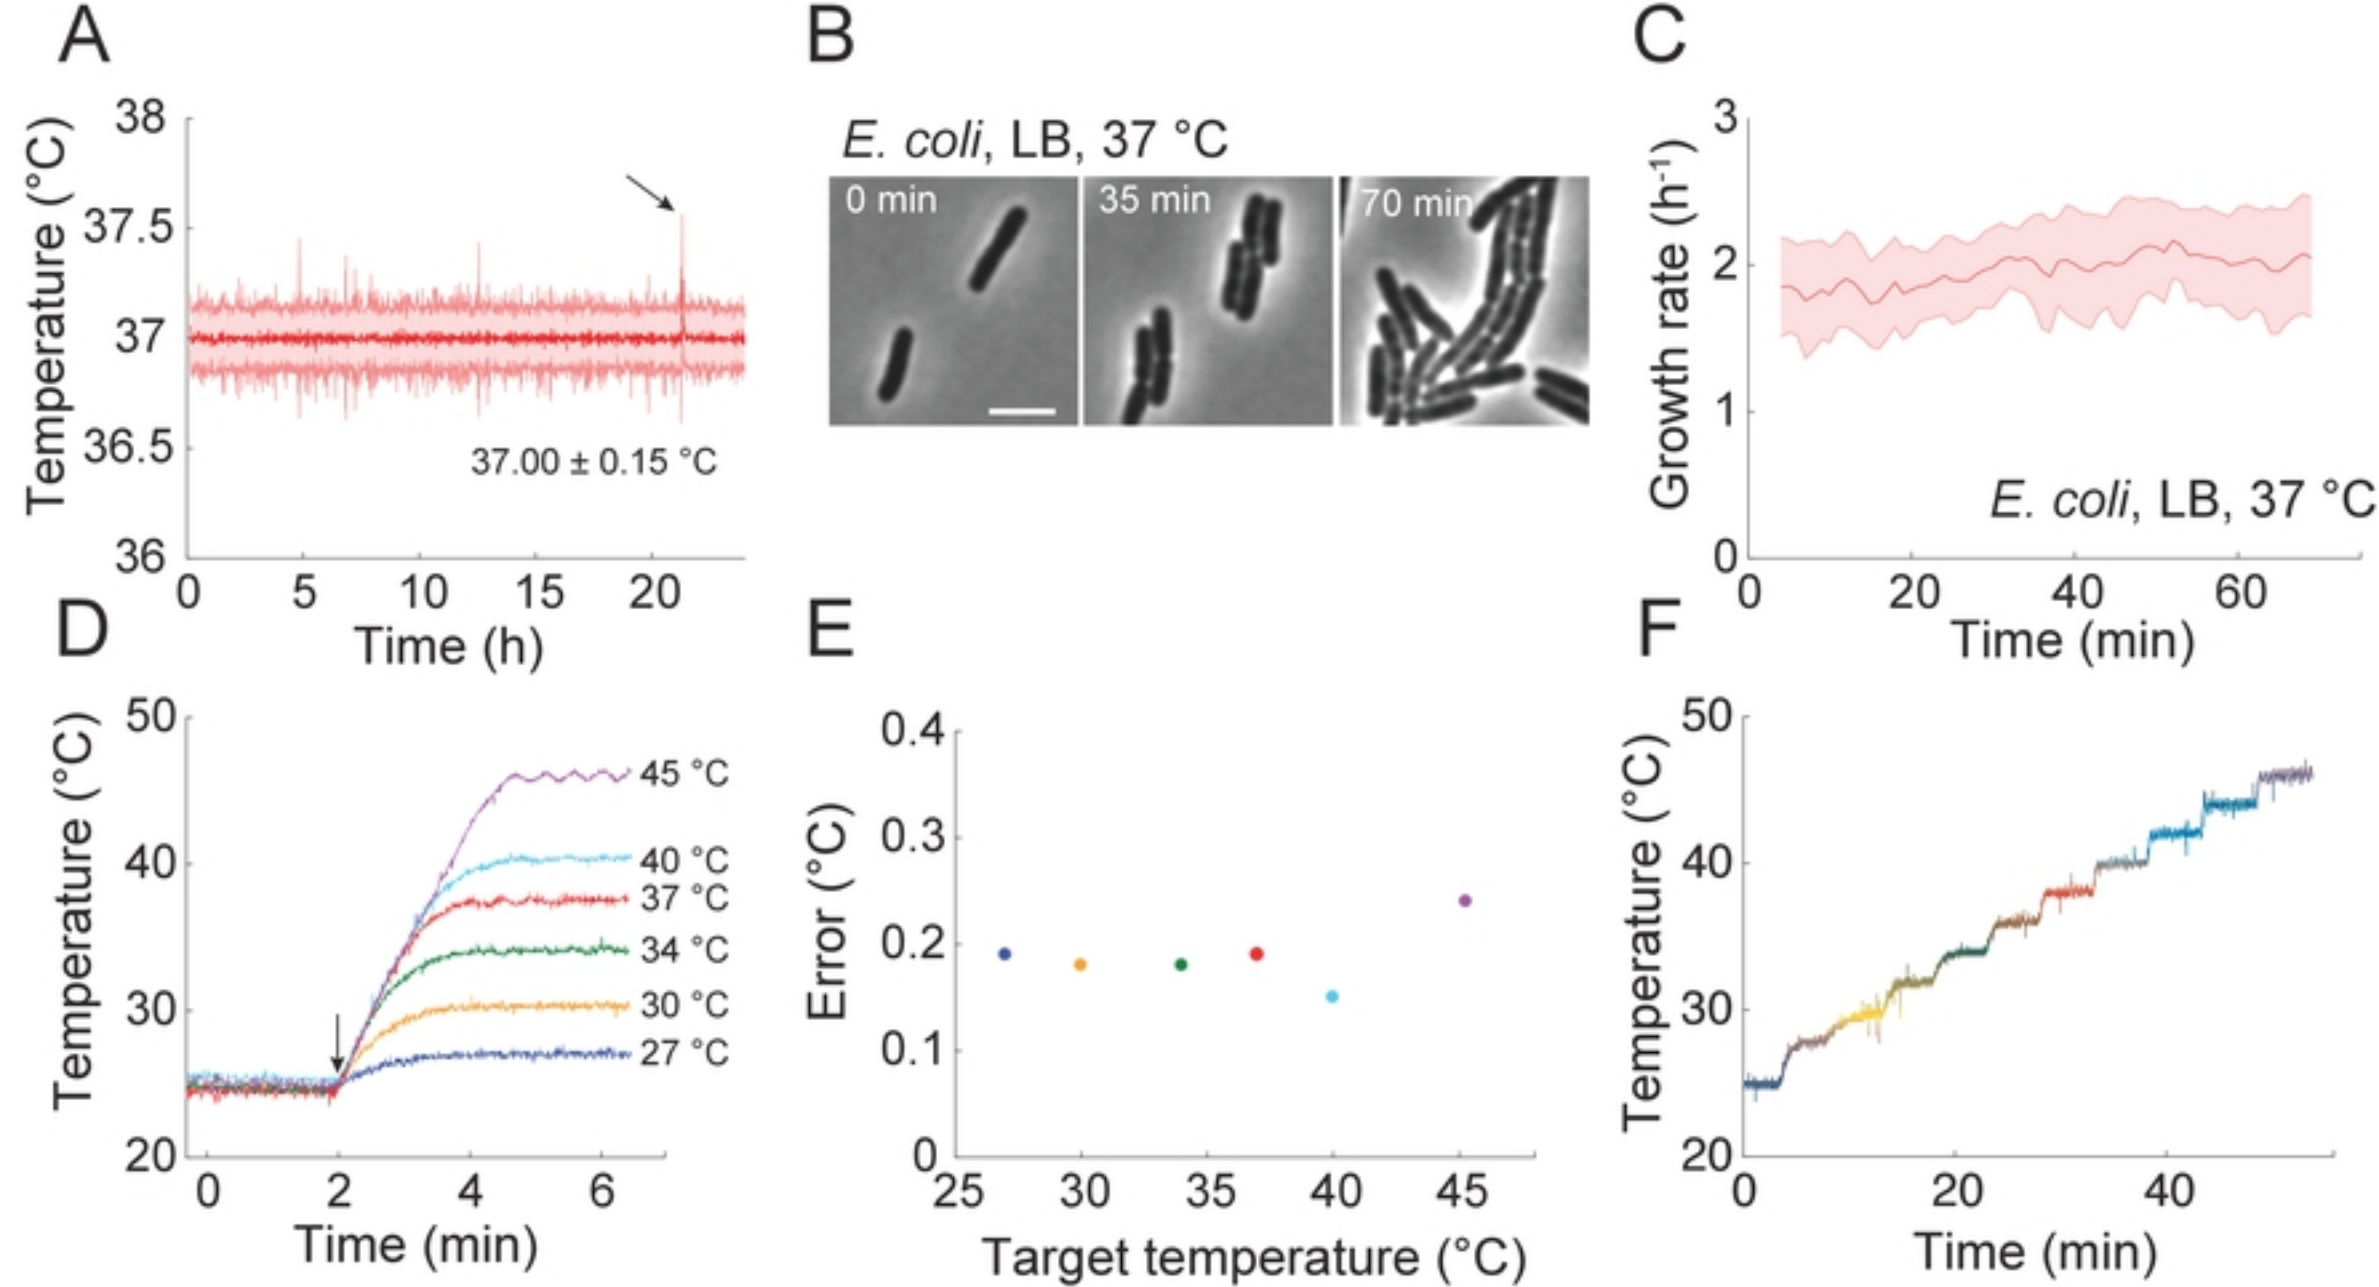

Figure 3

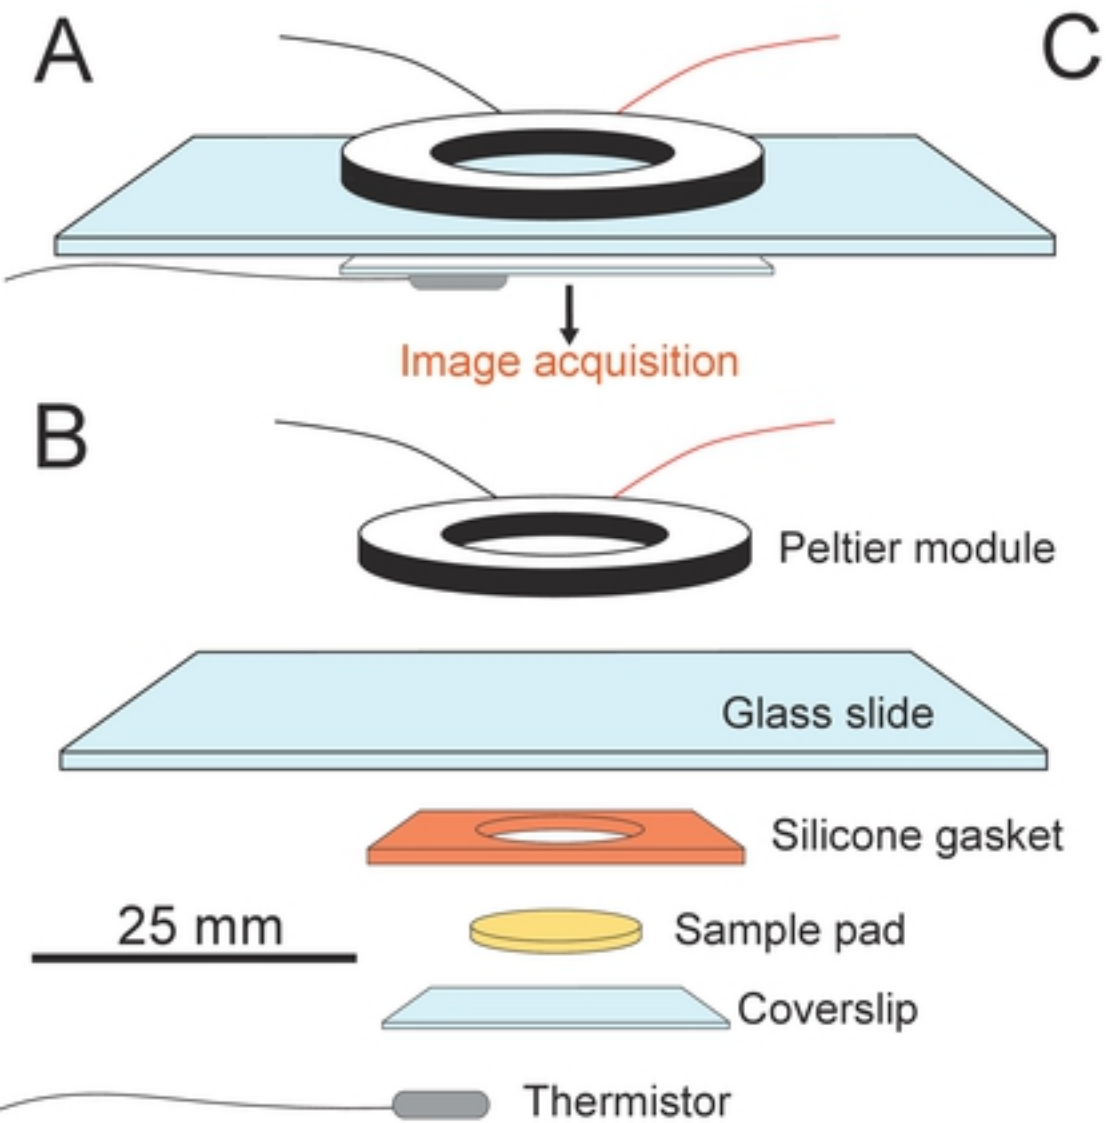

**C**

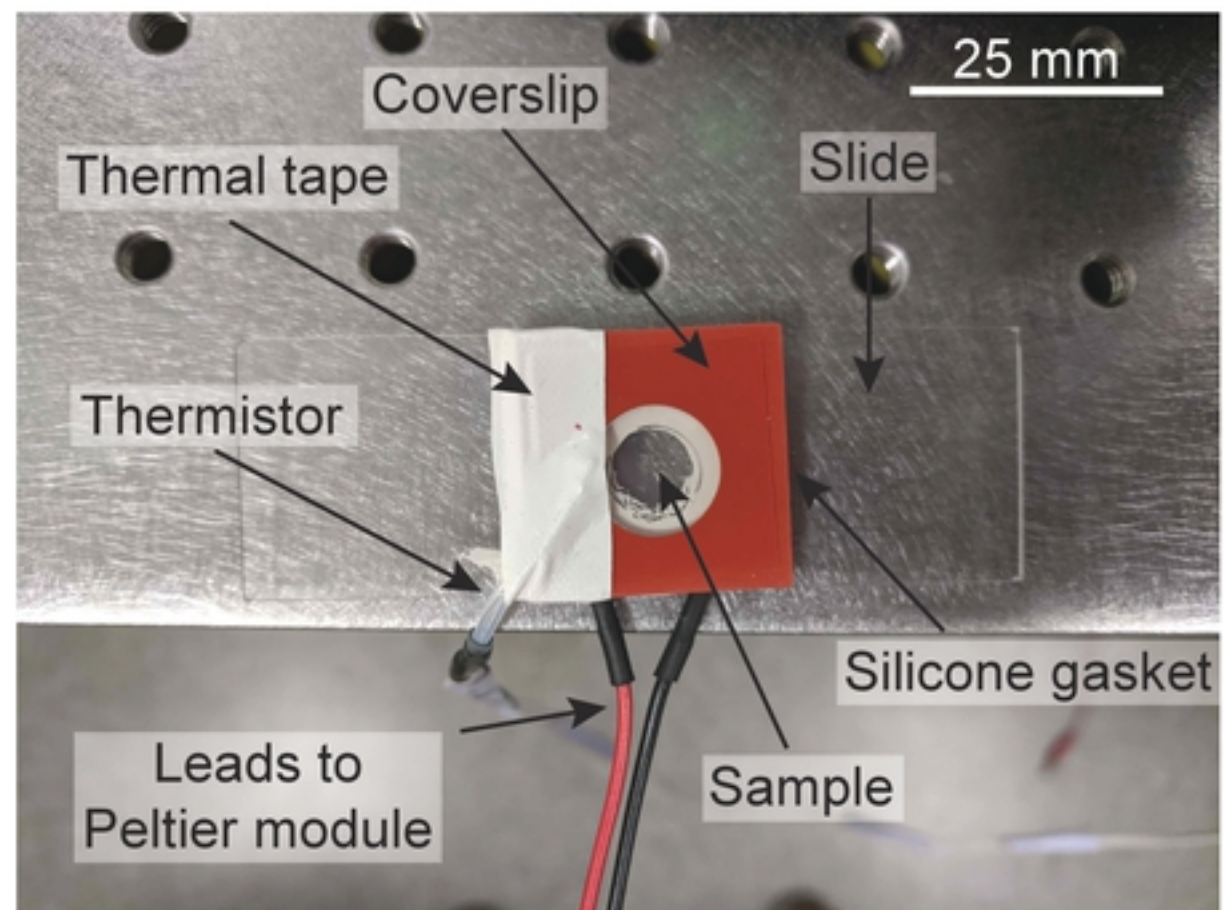

Figure 1



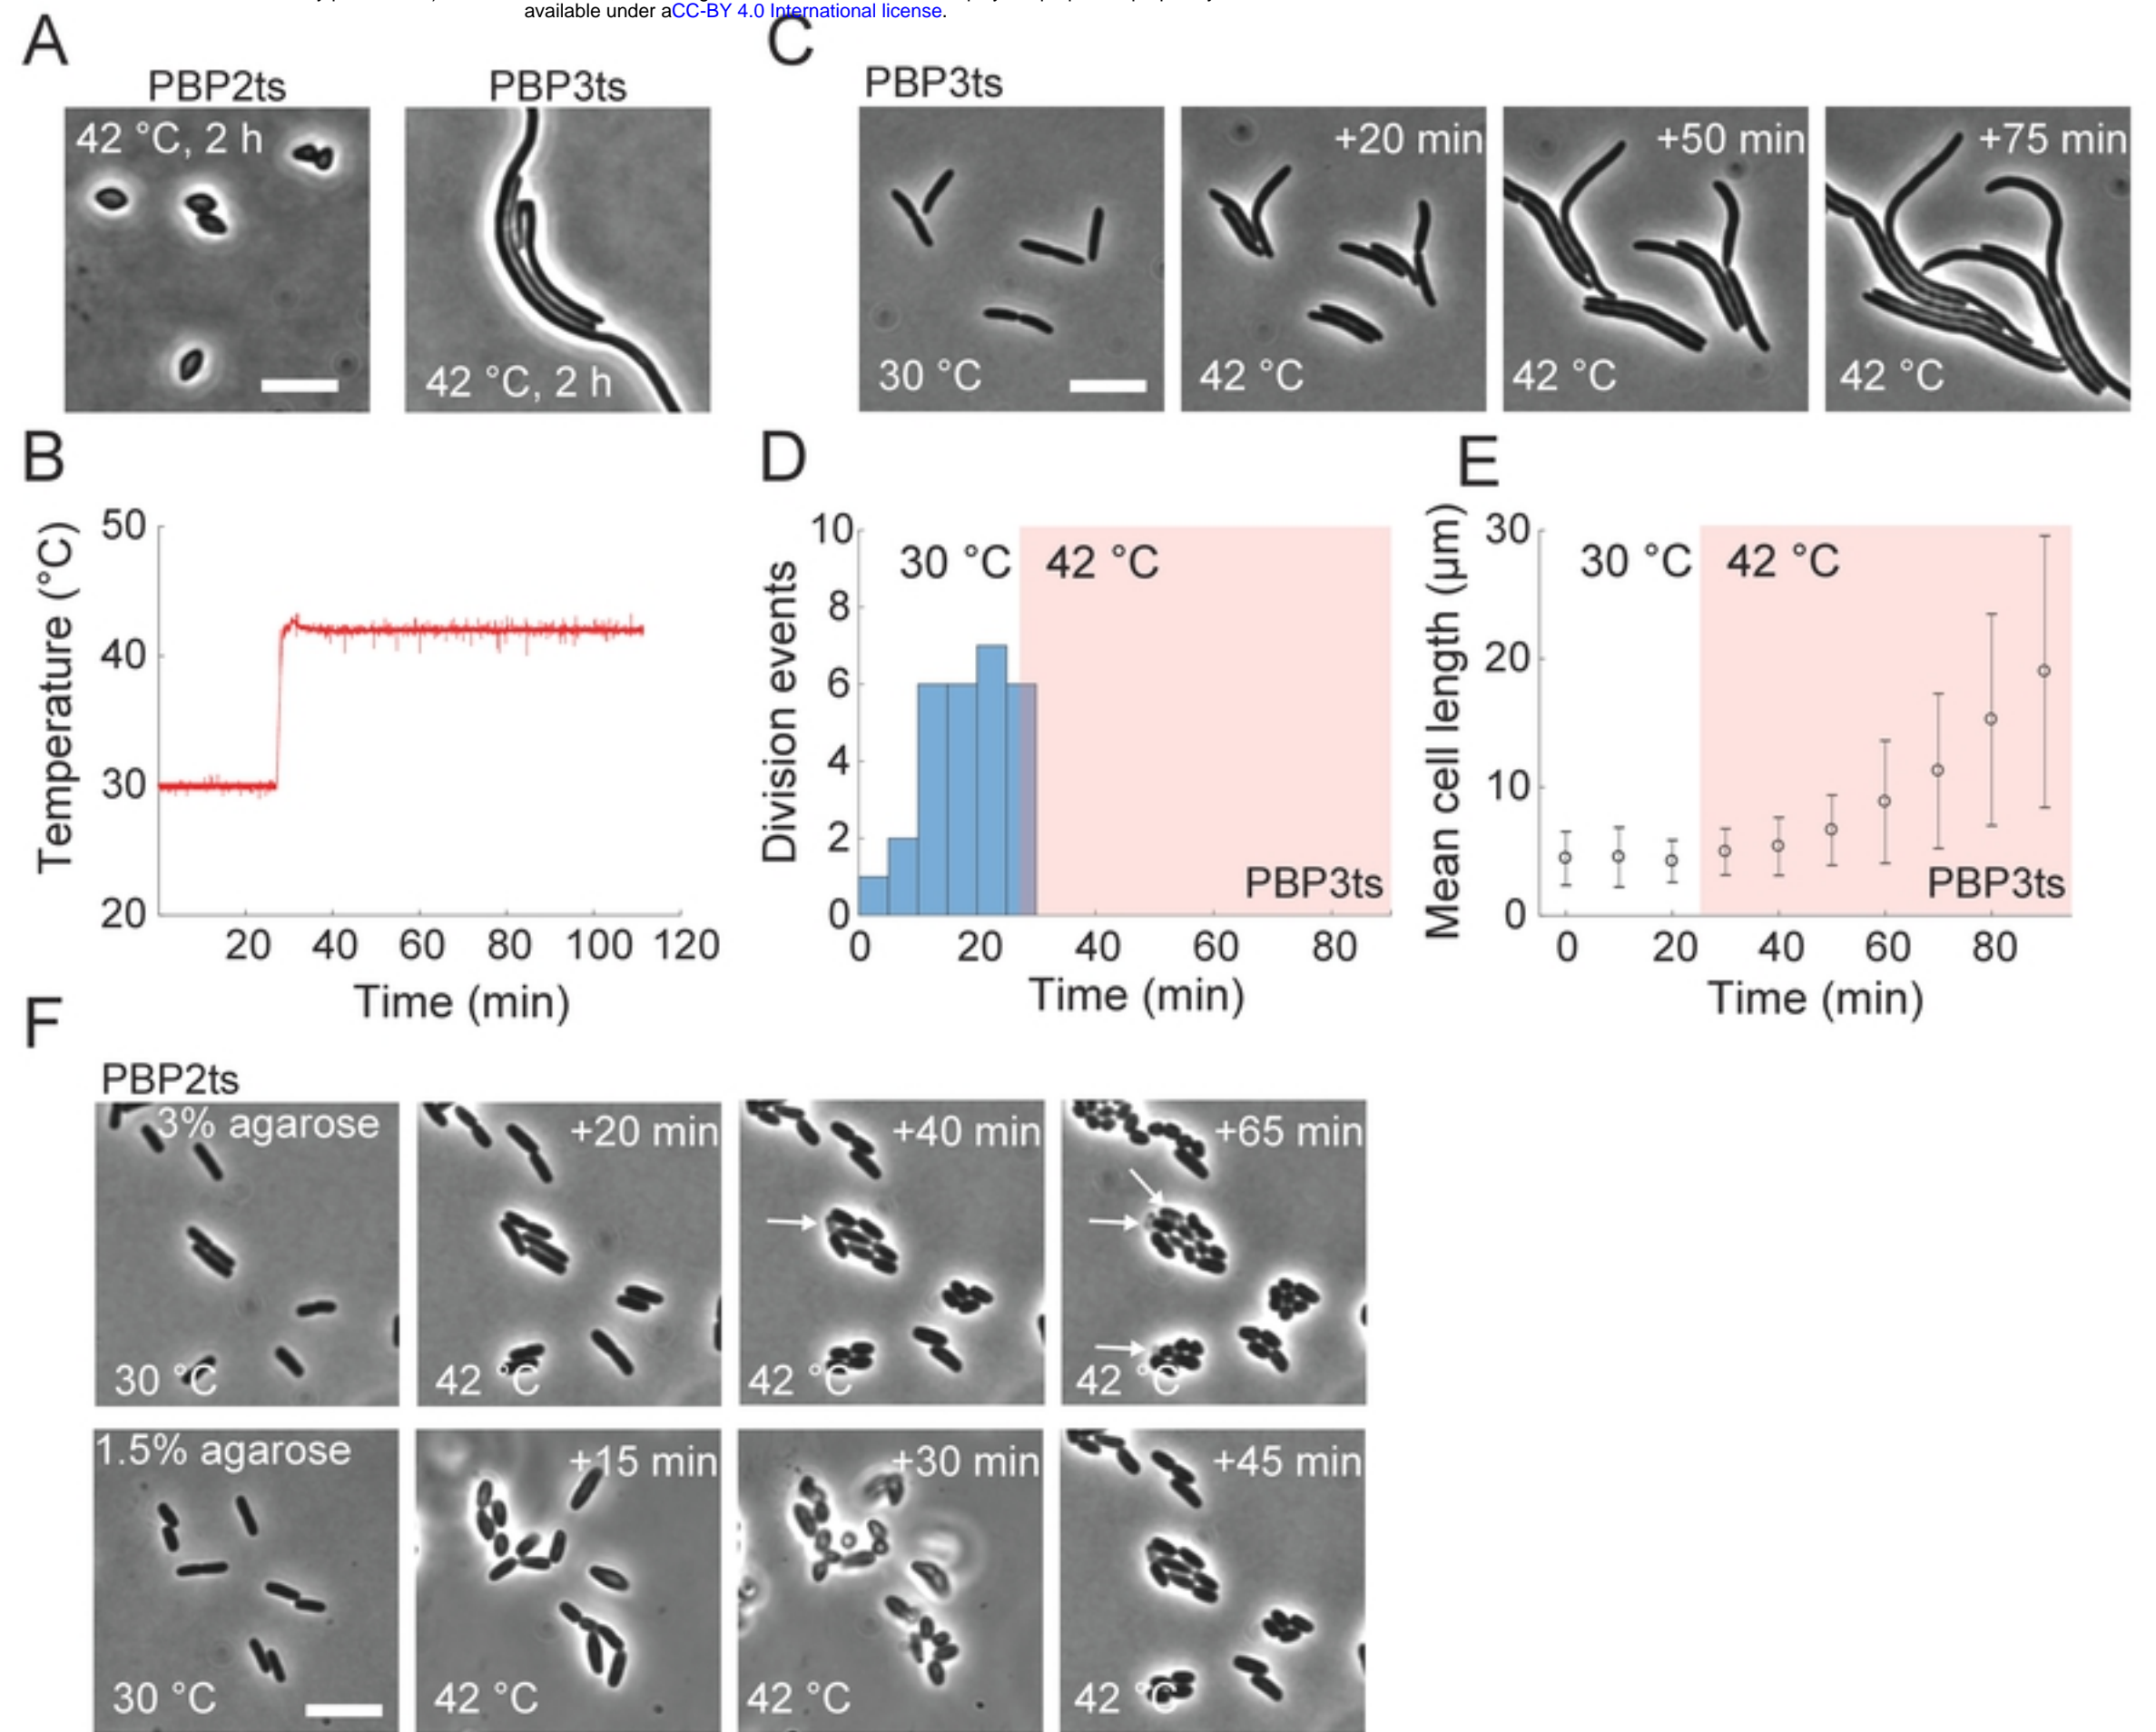

Figure 6

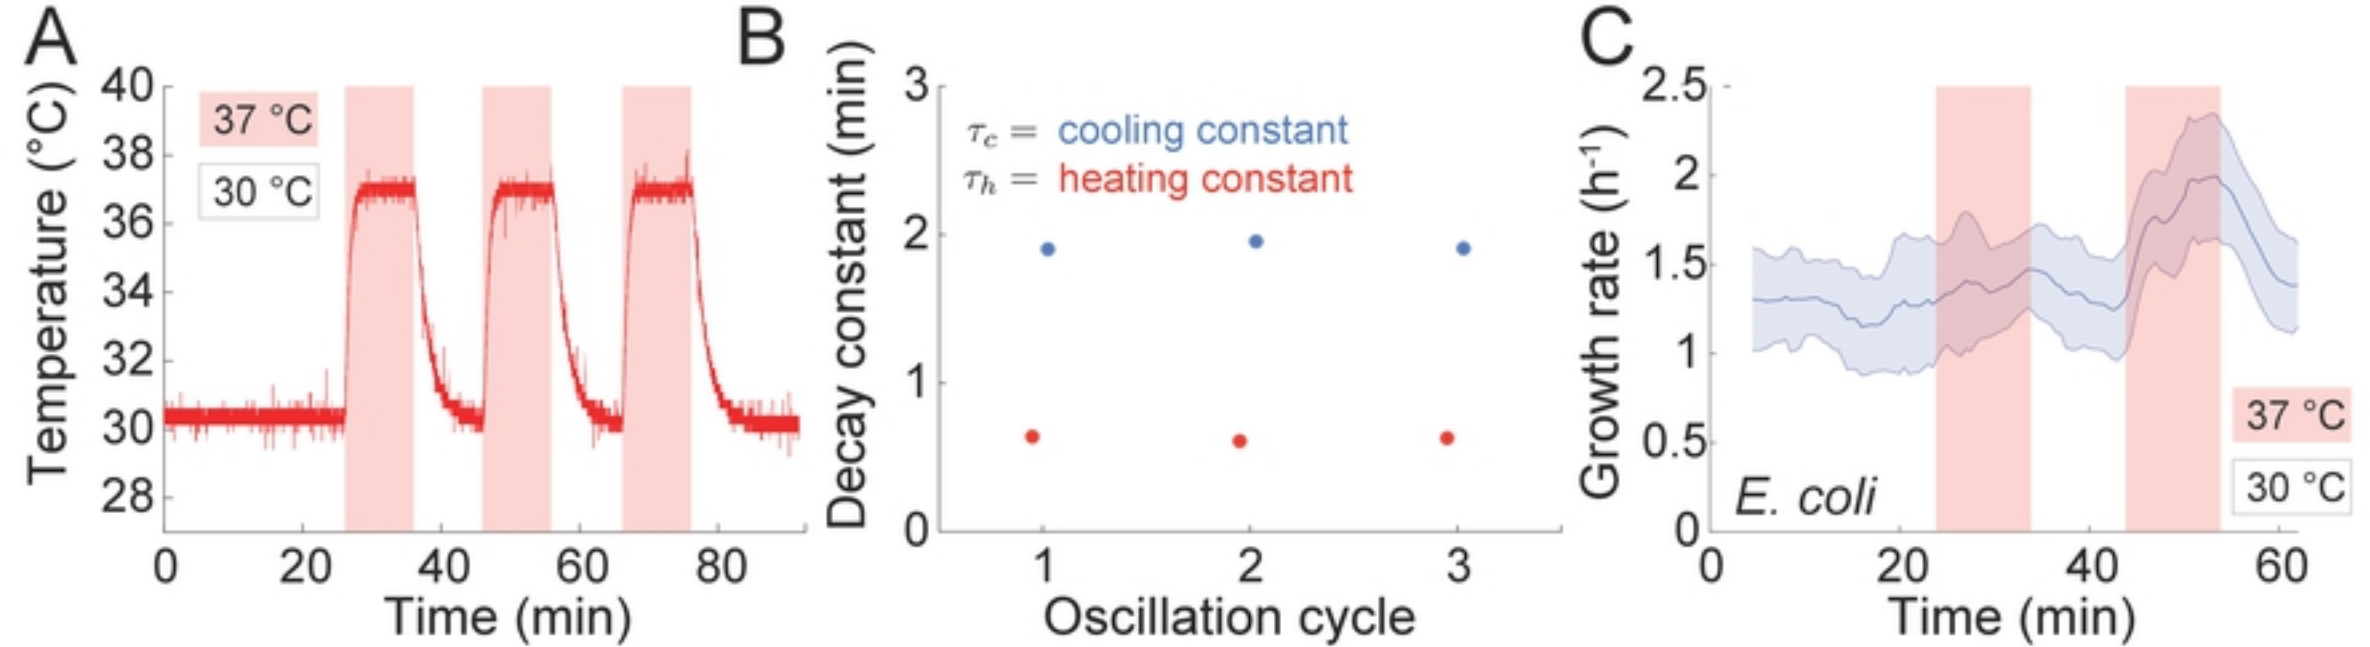

Figure 5
